1 **Performance evaluation of a new custom, multi-component DNA isolation method**  
2 **optimized for use in shotgun metagenomic sequencing-based aerosol microbiome research**

3

4 **Authors:** Kari Oline Bøifot<sup>1,2</sup>, Jostein Gohli<sup>1</sup>, Line Victoria Moen<sup>1</sup>, and Marius Dybwad<sup>1,2\*</sup>

5

6 <sup>1)</sup> Norwegian Defence Research Establishment, P O Box 25, NO-2027 Kjeller, Norway

7 <sup>2)</sup> Department of Analytics, Environmental & Forensic Sciences, King's College London,  
8 150 Stamford Street, London SE1 9NH, UK

9

10 **\*Correspondent author.** Address: Norwegian Defence Research Establishment, P O Box 25,

11 NO-2027 Kjeller, Norway, Phone: (+47) 63 80 78 39, Fax: (+47) 63 80 71 15, E-mail:

12 marius.dybwad@ffi.no

13

14

15

16

17

18

19

20

21

22

23

24

25 **ABSTRACT**

26

27 **Background**

28 Aerosol microbiome research advances our understanding of bioaerosols, including how airborne  
29 microorganisms affect our health and surrounding environment. Traditional  
30 microbiological/molecular methods are commonly used to study bioaerosols, but do not allow for  
31 generic, unbiased microbiome profiling. Recent studies have adopted shotgun metagenomic  
32 sequencing (SMS) to address this issue. However, SMS requires relatively large DNA inputs,  
33 which are challenging when studying low biomass air environments, and puts high requirements  
34 on air sampling, sample processing and DNA isolation protocols. Previous SMS studies have  
35 consequently adopted various mitigation strategies, including long-duration sampling, sample  
36 pooling, and whole genome amplification, each associated with some inherent  
37 drawbacks/limitations.

38

39 **Results**

40 Here, we demonstrate a new custom, multi-component DNA isolation method optimized for  
41 SMS-based aerosol microbiome research. The method achieves improved DNA yields from  
42 filter-collected air samples by isolating DNA from the entire filter extract, and ensures unbiased  
43 microbiome representation by combining chemical, enzymatic and mechanical lysis.  
44 Benchmarking against two state-of-the-art DNA isolation methods was performed with a mock  
45 microbial community and real-world subway air samples. All methods demonstrated similar  
46 performance regarding DNA yield and community representation with the mock community.  
47 However, with subway air samples, the new method obtained drastically improved DNA yields,  
48 while SMS revealed that the new method reported higher diversity and gave better taxonomic

49 coverage. The new method involves intermediate filter extract separation into a pellet and  
50 supernatant fraction. Using subway air samples, we demonstrate that supernatant inclusion results  
51 in improved DNA yields. Furthermore, SMS of pellet and supernatant fractions revealed overall  
52 similar taxonomic composition but also identified differences that could bias the microbiome  
53 profile, emphasizing the importance of processing the entire filter extract.

54

## 55 **Conclusions**

56 By demonstrating and benchmarking a new DNA isolation method optimized for SMS-based  
57 aerosol microbiome research with both a mock microbial community and real-world air samples,  
58 this study contributes to improved selection, harmonization, and standardization of DNA  
59 isolation methods. Our findings highlight the importance of ensuring end-to-end sample integrity  
60 and using methods with well-defined performance characteristics. Taken together, the  
61 demonstrated performance characteristics suggest the new method could be used to improve the  
62 quality of SMS-based aerosol microbiome research in low biomass air environments.

63

## 64 **KEYWORDS**

65

66 Aerosol Microbiome; Air Sampling; DNA Isolation; Shotgun Metagenomic Sequencing

67

68

69

70

71

72

## 73 **BACKGROUND**

74  
75 The study of bioaerosols is an emerging and expanding research discipline [1], with several  
76 important study applications, including surveillance of clinically relevant microbes [2-5], air  
77 quality monitoring [6-8] and biodefense [9]. Bioaerosol research has traditionally relied on  
78 culture methods; however, few microorganisms grow under standard laboratory conditions,  
79 resulting in underrepresentation of the true microbial diversity [10-13]. Although culture methods  
80 are still in use, culture-independent methods are now widespread. Due to the low amount of DNA  
81 that is typically obtained from air samples, most culture-independent bioaerosol studies to date  
82 have used PCR to target either the bacterial 16S rRNA gene [14, 15] or the fungal 18S rRNA  
83 gene/internal transcribed spacer (ITS) region, followed by amplicon sequencing [16, 17]. In  
84 contrast to the amplicon sequencing approach, shotgun metagenomic sequencing (SMS) allows  
85 for generic, unbiased interrogation of microbial diversity in a sample. However, SMS will  
86 typically require a higher quality and quantity of DNA for analysis than other molecular methods.  
87 SMS has been used to characterize the human microbiome [18] and environmental microbiomes  
88 [19, 20], and has recently been implemented in a few aerosol microbiome studies [2, 21, 22].

89         Although bioaerosols originate from many different sources and are ubiquitous in almost  
90 any indoor and outdoor environment, air is still a very low biomass environment compared to e.g.  
91 soil, feces and water [23]. The low biomass makes it challenging to obtain sufficient DNA  
92 amounts for downstream analyses, especially in the context of SMS [21]. An important first step  
93 in recovering sufficient biomass and a representative sample from air involves the use of well-  
94 characterized air samplers that are capable of rapid and efficient biomass collection [24]. Filter-  
95 based aerosol collection is a commonly used method, and the use of hand-portable, high-volume  
96 filter-based air sampling equipment may improve the spatiotemporal resolution in aerosol

97 microbiome research [24, 25]. The post-sampling processing steps are also important since the  
98 filter-collected biomass must be transformed into a representative high quality DNA sample with  
99 minimal loss. It is therefore essential to use a well-characterized DNA isolation method that is  
100 capable of thorough unbiased biomass lysis, sufficient inhibitor removal and sample clean-up,  
101 and high efficiency recovery of DNA [25]. In short, the main challenges are typically obtaining  
102 sufficient DNA amounts and capturing representative samples that reflect the true diversity of the  
103 sampled air environment [2, 22, 25, 26].

104         With recent advancements in sequencing technology, along with the development of  
105 improved strategies for air sampling and sample processing, it should be possible to mitigate the  
106 low biomass challenge. Mitigation strategies that have been attempted in the past include long-  
107 duration sampling (days to weeks), pooling of multiple air samples, whole genome amplification  
108 (WGA) techniques, and modification of commercial DNA isolation kits originally developed for  
109 other environmental matrices such as water and soil [2, 21, 27-29]. Increasing the air sampling  
110 time is a common strategy to improve the DNA yield, but this approach may not always be  
111 practical. For example, in studies where the aim is to address spatiotemporal variability, the need  
112 for long-duration air sampling (e.g. days to weeks) exclude the possibility of aerosol microbiome  
113 investigations on shorter timescales. Another challenge with increased air sampling time is that  
114 long-duration filter collection may compromise the integrity of stress-sensitive microorganisms,  
115 e.g. due to desiccation and osmotic shock [27], and thereby cause a potential loss of DNA from  
116 organisms that become membrane-compromised, ruptured or lysed during filter extraction and  
117 subsequent processing steps prior to DNA isolation. Liquid extraction of aerosol filters often  
118 results in sample volumes that are too large to process with most commercial DNA isolation kits.  
119 This introduces a need for adopting additional post-extraction filtration or centrifugation steps to  
120 reduce the sample volume before DNA isolation, which may result in loss of both intact

121 microorganisms and DNA, and thereby compromise the sample integrity regarding both yield and  
122 composition (diversity). Furthermore, long-duration, high-volume air sampling alone does not  
123 always translate into successful recovery of sufficient DNA amounts for SMS [2, 21, 28, 29].  
124 This may be due to the use of different downstream sample processing and DNA isolation  
125 methods that have not been sufficiently evaluated regarding their specific performance on air  
126 samples, and which therefore may deliver suboptimal performance regarding biomass lysis  
127 and/or DNA recovery efficiency. Various modifications of existing sample processing and DNA  
128 isolation methods have been proposed to improve the DNA yield from filter-collected air  
129 samples. Jiang et al. modified the DNeasy (former MO-BIO) PowerSoil Kit by replacing the  
130 silica spin column with AMPure XP beads, and introduced sample pre-treatment steps and a  
131 secondary filtration step [28]. Yooseph et al. introduced a WGA step to generate sufficient DNA  
132 amounts from air samples for SMS [21]. King et al. performed liquid extraction of aerosol filters  
133 followed by a secondary filtration step and DNA isolation with the DNeasy PowerWater Kit, and  
134 precipitated DNA from the original filtrate before combining the two DNA fractions [2].  
135 Dommergue et al., who also used the DNeasy PowerWater Kit, placed the aerosol filters directly  
136 in PowerBead tubes, introduced sample pre-treatment steps, and a centrifugation step to  
137 maximize lysate recovery from PowerBead tubes [29]. Recovery of sufficient DNA amounts and  
138 preservation of unbiased microbial diversity from air samples is essential to ensure reliable  
139 results in SMS-based aerosol microbiome research. Several studies on other sample matrices  
140 have looked into how DNA yields can be improved and microbial diversity preserved. Tighe et  
141 al. found that using a multi-enzyme cocktail (MetaPolyzyme) that targets bacterial and fungal cell  
142 wall components resulted in improved DNA yields [30]. Yuan et al. evaluated different DNA  
143 isolation methods for human microbiome samples, and found bead beating and enzymatic lysis to  
144 be essential for obtaining an accurate representation of microorganisms in a complex mock

145 community [31]. Abusleme et al. found that bead beating may limit the DNA yield, but also that  
146 bead beating was necessary to detect all organisms in a complex mock bacterial community [32].  
147 These observations suggest that biomass lysis based on a combination of chemical, enzymatic  
148 and mechanical principles may be useful to minimize microbiome composition (diversity) bias  
149 resulting from insufficient biomass lysis during isolation of DNA from complex environmental  
150 assemblages.

151 It is well established that the choice of DNA isolation method should be based on careful  
152 consideration of the specific study aims, including type of targeted organisms and environmental  
153 matrices [33]. However, substantial uncertainty exists regarding the extent of microbiome  
154 composition (diversity) bias that may be introduced by the use of different sample processing and  
155 DNA isolation methods, which makes it difficult to reliably compare microbiome results between  
156 different studies and environments. Consequently, several attempts have in recent years been  
157 made to improve the harmonization and standardization of DNA isolation methods, especially for  
158 common sample matrices such as human [31, 34], soil [35], and water [36] samples. Lear et al.  
159 recommended DNA isolation kits for different environmental matrices such as soil, plant and  
160 animal tissue, and water [37]. The Earth Microbiome Project demonstrated how procedural  
161 standardization allows for comparison of microbial diversity in samples from across the globe  
162 [35]. Dommergue et al. proposed an air sampling, filter extraction and DNA isolation method  
163 where microbial diversity and chemical composition in air can be investigated using existing  
164 high-volume particulate matter samplers used for atmospheric pollution monitoring [29].  
165 Nevertheless, despite substantial effort several unresolved issues remain, e.g., the current reliance  
166 on long-duration air sampling raises some questions regarding sample integrity and only offers  
167 support for low temporal resolution studies since the necessary sampling time may be days or  
168 even weeks. Hence, performance benchmarking, harmonization, and standardization of air

169 sampling, sample processing and DNA isolation methods is a topic that warrants further study,  
170 and especially in the context of SMS-based aerosol microbiome research, which is a research  
171 field still largely in its infancy.

172         The aim of this study was to demonstrate a new custom, multi-component DNA isolation  
173 method optimized for SMS-based aerosol microbiome research and perform a comprehensive  
174 performance benchmarking of the new method. The custom, multi-component DNA isolation  
175 method was specifically developed to maximize the DNA yield and ensure unbiased biomass  
176 lysis from low biomass environmental air samples. The DNA isolation method, hereafter referred  
177 to as the “MetaSUB method”, was developed for the MetaSUB Consortium ([www.metasub.org](http://www.metasub.org))  
178 to complement an ongoing global effort to characterize subway and urban environment  
179 microbiomes using surface swab samples, by extending the effort to also include air samples. The  
180 MetaSUB method was benchmarked against two other state-of-the-art DNA isolation methods: a  
181 custom multi-component DNA isolation method developed for use in aerosol microbiome  
182 research published by Jiang et al. [28], and the commercial ZymoBIOMICS DNA Microprep Kit  
183 commonly used in environmental microbiome studies [38-41]. The performance of the three  
184 DNA isolation methods was evaluated using both a mock microbial community and real-world  
185 low biomass subway air samples. As part of this study, we also describe an end-to-end high-  
186 volume filter-based air sampling, filter processing and DNA isolation method, hereafter referred  
187 to as the “end-to-end MetaSUB method”. Since the MetaSUB method, when used as an  
188 integrated element of the end-to-end MetaSUB method, involves intermediate separation of the  
189 filter extract into a pellet (subjected to additional lysis) and supernatant fraction that is combined  
190 before final DNA purification, the relative contribution of the two fractions to the total DNA  
191 yield and observed aerosol microbiome profile was also evaluated using subway air samples.

192



## 193 **METHODS**

194

### 195 **MetaSUB method**

196 The end-to-end MetaSUB method consists of an integrated air sampling, filter processing and  
197 DNA isolation scheme (Figure 1). The method relies on the use of high-volume, battery-operated,  
198 hand-portable, electret filter-based air samplers that allow for flexible, user-adjustable sampling  
199 time and rapid change of sampling locations, which in turn provides support for high  
200 spatiotemporal resolution air (aerosol biomass) sampling campaigns. Following air sampling, the  
201 electret microfibrous filter is subjected to a liquid filter extraction procedure, after which the  
202 entire filter extract is processed to avoid the need for downstream filtration or centrifugation steps  
203 to reduce the sample volume prior to DNA isolation, which may compromise the sample integrity  
204 regarding both biomass and DNA yield and composition (diversity).

### 205 ***Bioaerosol collection***

206 Air (aerosol biomass) samples were collected with SASS3100 (Research International, Monroe,  
207 WA, USA), a high-volume electret microfibrous filter-based air sampler. The air sampler was  
208 powered by UBI-2590 lithium-ion rechargeable batteries (Ultralife batteries, NY, USA), operated  
209 at a flowrate of 265 liters of air per minute (LPM), and mounted on a tripod (~1.5 meters above  
210 ground) with the inlet facing downward (45°) to avoid direct deposition of large particles. After  
211 sampling, the electret filters were stored in 50 ml polypropylene tubes at -80 °C until further  
212 processing.

### 213 ***Filter extraction***

214 Liquid extraction of filter-collected aerosol biomass from the electret filters was performed by  
215 removing the filters from their housing and transferring them into 50 ml polypropylene tubes pre-

216 loaded with 10 ml NucliSENS Lysis Buffer (BioMérieux, Marcy-l'Étoile, France). The sample  
217 tube was vortexed at maximum speed for 20 seconds before the filter was transferred into a 10 ml  
218 syringe with sterile forceps to extract residual liquid back into the sample tube before discarding  
219 the filter. The sample tube was centrifuged (7000 x g, 30 minutes) and the supernatant transferred  
220 to a new 50 ml polypropylene tube (referred to as filter extract supernatant).

### 221 ***DNA isolation***

222 The pellet from the sample tube (referred to as filter extract pellet) was transferred to a  
223 polypropylene microcentrifuge tube with 1 ml PBS (pH 7.5, Sigma-Aldrich, St. Louis, MO,  
224 USA) and centrifuged (17 000 x g, 5 minutes). The resulting supernatant was carefully removed  
225 and combined with the filter extract supernatant. The pellet was dissolved in 150 µl PBS (pH  
226 7.5). MetaPolzyme (Sigma-Aldrich), a multi-enzyme cocktail, was prepared by dissolving the  
227 enzyme powder in 1 ml PBS (pH 7.5), and 10 µl MetaPolzyme (5 mg/ml) and 5 µl sodium azide  
228 (0.1 M, Sigma-Aldrich) was added to the dissolved pellet sample. Enzymatic digestion was  
229 performed at 35°C for 1 hour in a Thermomixer (Eppendorf, Hamburg, Germany) at 1400 rpm.  
230 Subsequently, the sample was transferred to ZR BashingBead Lysis Tubes (0.1/0.5 mm beads,  
231 Zymo Research, Irvine, CA, USA) prefilled with 550 µl PowerSoil Bead Solution (Qiagen,  
232 Hilden, Germany) and 60 µl PowerSoil Solution C1 (Qiagen). Bead tubes were subjected to bead  
233 beating (17 000 x g, 3 minutes) in a Mini Bead Beater-8 (BioSpec Products, Bartlesville, OK,  
234 USA). Bead tubes were centrifuged (13 000 x g, 2 minutes) and the supernatant treated with  
235 Solution C2 and C3 according to the DNeasy PowerSoil protocol (Qiagen). The resulting  
236 supernatant was combined with the original filter extract supernatant before DNA purification.  
237 DNA was purified according to the manual protocol of the NucliSENS Magnetic Extraction  
238 Reagents kit (BioMérieux) with two modifications; magnetic silica suspension volume was

239 increased to 90  $\mu$ l and incubation time was increased to 20 minutes. DNA samples were stored at  
240 -80°C until further processing.

241

#### 242 **DNA isolation method described by Jiang et al. (Jiang method)**

243 The custom, multi-component DNA isolation method (protocol steps 13-24) for air samples  
244 published by Jiang et al. [28] is based on the DNeasy PowerSoil Kit and AMPure XP magnetic  
245 bead separation. Jiang et al. introduced an incubation step in water bath (65°C) before bead  
246 vortexing, and found that magnetic bead capture recovered more DNA than standard PowerSoil  
247 spin columns. The DNA isolation method (protocol steps 13-24) published by Jiang et al.  
248 (hereafter referred to as “Jiang”) was used in this study with some minor modifications. Briefly,  
249 all samples were pretreated with MetaPolyzyme (as described for the MetaSUB method), before  
250 transfer to PowerBead tubes and continuation of DNA isolation according to the Jiang protocol.

251

#### 252 **ZymoBIOMICS DNA Microprep Kit (Zymobiomics method)**

253 DNA isolation was performed according to the ZymoBIOMICS DNA Microprep Kit (Zymo  
254 Research) protocol (hereafter referred to as “Zymobiomics”) with some minor modifications.  
255 Briefly, all samples were pretreated with MetaPolyzyme (as described for the MetaSUB method)  
256 and bead beating was performed in a Mini Bead Beater-8 (BioSpec Products) for 3 minutes.

257

#### 258 **Performance evaluation using mock microbial community**

259 The MetaSUB method was compared to the Jiang and Zymobiomics methods using a mock  
260 microbial community with a defined quantity and composition. The ZymoBIOMICS Microbial  
261 Community Standard (Zymo Research) contains ten microorganisms, eight bacteria (five Gram-

262 positives and three Gram-negatives) and two yeasts. For each sample, the mock community (10  
263  $\mu$ l), corresponding to a theoretical total DNA content of approximately 267 ng, was added to 140  
264  $\mu$ l PBS (pH 7.5) and treated with MetaPolyzyme (as described for the MetaSUB method) before  
265 DNA isolation according to the three DNA isolation methods. Total DNA and 16S rRNA gene  
266 copy yields were measured for four sample pairs processed with MetaSUB (N=4) and Jiang  
267 (N=4) and six sample pairs processed with MetaSUB (N=6) and Zymobiomics (N=6). The  
268 within-sample differences in total DNA and 16S rRNA gene copy yields were evaluated with  
269 one-sample t-tests ( $H_0$ : difference=0). All statistical analyses were performed in R (version3.4.3,  
270 [www.R-project.org](http://www.R-project.org)). A subset of the mock community samples were subjected to SMS (N=12):  
271 MetaSUB (N=4), Jiang (N=4), and Zymobiomics (N=4).

272

### 273 **Performance evaluation using subway air samples**

274 The MetaSUB method was compared to the Jiang and Zymobiomics methods using subway air  
275 samples. Only the DNA isolation part of the end-to-end MetaSUB method was evaluated since  
276 the air sampling and filter-processing steps were used to collect and process subway air samples  
277 to generate equal aliquots of aerosol biomass for paired difference comparisons. An overview of  
278 the common sample processing steps and the three evaluated DNA isolation methods is given in  
279 Table 1. Air samples were collected for 1 hour, corresponding to  $\sim 16 \text{ m}^3$  of air sampled (60  
280 minutes sampling at 265 LPM), during daytime hours at subway stations (Tøyen, Grønland,  
281 Stortinget, Nationaltheateret and Majorstuen) in Oslo, Norway, in the period between October  
282 2017 and May 2018. The filter-collected samples were extracted in 10 ml NucliSENS lysis buffer  
283 and split into two equal filter extract aliquots. The aliquots were centrifuged (7000 x g, 30  
284 minutes) and only the pellet fractions were used for the comparison of DNA isolation methods.  
285 The supernatant fractions were subjected to DNA isolation separately (as described below) and

286 used to investigate the distribution of DNA in the intermediate pellet and supernatant fractions of  
287 the MetaSUB method. For the DNA isolation method comparison, 24 air samples were split and  
288 the pellets processed with either MetaSUB (N=10) and Jiang (N=10) or MetaSUB (N=14) and  
289 Zymobiomics (N=14), to enable within-sample comparisons between the MetaSUB method and  
290 the two other methods. Since the supernatant fraction was not included in the MetaSUB method  
291 for the DNA isolation method comparison, 10 ml of fresh NucliSENS lysis buffer was used.  
292 Negative controls (reagents) were included for each DNA isolation method. Total DNA and 16S  
293 rRNA gene copy yields were examined and within-sample differences were evaluated with one-  
294 sample t-tests ( $H_0$ : difference=0). All statistical analyses were performed in R (version3.4.3,  
295 [www.R-project.org](http://www.R-project.org)). A subset of the subway air samples (N=6) that had been split into two equal  
296 aliquots and processed with the three DNA isolation methods were subjected to SMS (N=12):  
297 MetaSUB (N=3) v. Jiang (N=3) and MetaSUB (N=3) v. Zymobiomics (N=3). A negative control  
298 (reagents) for each DNA isolation method was also subjected to SMS (N=3).

299

### 300 **DNA distribution in intermediate pellet/supernatant fractions of the MetaSUB method**

301 The filter extraction procedure of the MetaSUB method generates two intermediate fractions  
302 (pellet and supernatant) that are usually recombined before the final DNA purification (Figure 1).  
303 Differences in total DNA and 16S rRNA gene copy yields between pellet (N=24) and supernatant  
304 (N=24) fractions were therefore investigated. DNA was isolated from the supernatant fractions  
305 from subway air samples (described above) with the NucliSENS Magnetic Extraction Reagents  
306 kit as described for the MetaSUB method. Furthermore, to identify potential differences in DNA  
307 composition (diversity) between the pellet and supernatant fractions, DNA isolated with the  
308 MetaSUB method from six paired pellet and supernatant fractions (N=12) and one negative  
309 control (reagents; N=1) was subjected to SMS.

310

311 **Quantification of total DNA and 16S rRNA gene copies**

312 Total DNA was quantified with Qubit dsDNA HS assays (Life Technologies, Carlsbad, CA,  
313 USA) on a Qubit 3.0 Fluorimeter (Life Technologies). Bacterial 16S rRNA gene copies were  
314 determined with a 16S rRNA gene qPCR assay performed according to Liu et al. [42] on a  
315 LightCycler 480 instrument (Roche Diagnostics, Oslo, Norway). Serial dilutions of *Escherichia*  
316 *coli* DNA (seven 16S rRNA gene copies per genome) were used to generate a standard curve.

317

318 **Shotgun metagenomic sequencing (SMS)**

319 DNA isolated from mock community samples were subjected to SMS (150 bp paired-end)  
320 multiplexed on a MiSeq (~24-30 M paired-end reads, Illumina, San Diego, CA, USA). Library  
321 preparation was done with the Nextera DNA Flex kit (Illumina) according to the recommended  
322 protocol. DNA isolated from subway air samples were subjected to SMS (150 bp paired-end)  
323 multiplexed on one lane (~80-130M paired-end reads) on a HiSeq 3000 (Illumina). Library  
324 preparation was done with the ThruPLEX DNA-Seq kit (Takara Bio, Mountain View, CA, USA)  
325 according to the recommended protocol and 18 amplification cycles. Raw sequence reads were  
326 demultiplexed, quality trimmed (Trim Galore, v0.4.3;  $\geq Q20$ ,  $\geq 50$  bp) and underwent adapter  
327 removal (Cutadapt, v1.16), before analysis on the One Codex platform with default settings [43].  
328 One Codex taxonomic feature tables were imported into R and analyzed in the phyloseq package  
329 [44].

330 All sequence reads not taxonomically assigned to the species level were removed from the  
331 12 mock community samples. Since the aim was to gauge the relative contribution of the ten  
332 bacterial and fungal species in the mock community across the three DNA isolation methods,

333 non-target features were binned as “other”. The comparison was made by plotting normalized  
334 abundances across all 12 samples.

335 For the six subway air samples that were split into equal aliquots and processed with the  
336 three DNA isolation methods, MetaSUB (N=3) v. Jiang (N=3) and MetaSUB (N=3) v.  
337 Zymbiomics (N=3), all taxonomic features not assigned to the genus or species level, along with  
338 human reads, were removed. Prevalent features reported in the negative control samples (>1% of  
339 within-sample reads, four in total, accounting for 94.5% of all reads in the negative controls)  
340 were stripped from the entire dataset before removing the negative controls. The cleaned samples  
341 varied in the number of assigned reads, ranging from 1 160 976 to 5 530 138. After examining  
342 the effect of rarefaction on the  $\alpha$ -diversity measures "Observed", "Shannon", and "Simpson"  
343 (Figure S1), all samples were rarified to the lowest common depth (1 160 976).

344 The six paired pellet and supernatant fractions from subway air samples processed with  
345 the MetaSUB method underwent the same procedure: removing features not assigned to the  
346 genus or species level, along with human reads, and prevalent features in the negative control (12  
347 features, accounting for 99.3% of all reads in the negative control). The effect of rarefaction was  
348 evaluated (Figure S2), and all samples were rarified to the lowest common depth (453 218).

349 The cleaned SMS datasets were divided into six groups corresponding to the three  
350 comparisons (MetaSUB v. Jiang, MetaSUB v. Zymbiomics, and MetaSUB pellet v. supernatant)  
351 before summarizing the top phyla, families, genera and species within each group. Taxonomic  
352 features with species-level assignment were extracted for analyses of within-sample diversity ( $\alpha$ -  
353 diversity: "Observed", "Shannon", "Simpson"), where relevant groups were compared by fitting  
354 linear models. All features (read counts) were conglomerated to the genus level for analyses of  
355 among sample differences ( $\beta$  diversity); Bray Curtis distances were ordinated with PCoA and  
356 analyzed with MetaSUB/Jiang, MetaSUB/Zymbiomics, and pellet/supernatant, as predictors in

357 separate PERMANOVA tests. Distance estimation and PERMANOVA was performed with  
358 vegan (v.2.6.0, <https://github.com/vegandevs/vegan/>). Sample clustering was visualized with  
359 PCoA ordination. MegaBLAST analysis of forward reads against the NCBI non-redundant  
360 nucleotide database, followed by taxonomic binning using the native lowest common ancestor  
361 (LCA) algorithm in MEGAN6 [45], was used to perform a cross-kingdom analysis on the  
362 pellet/supernatant samples. Lastly, random forest classification models were performed, using  
363 10 001 trees, with MetaSUB/Jiang, MetaSUB/Zymobiomics, and pellet/supernatant, as response  
364 variable and One Codex (species-level) taxonomic features as predictor variables. Separate tests  
365 using 501 trees and 1000 permutations were performed to evaluate statistical significance. The  
366 random forest models were built using randomForest [46].

367

#### 368 **Accession numbers**

369 The sequence data has been deposited in the NCBI Sequence Read Archive under Bioproject ID#  
370 PRJNA542423 (<https://www.ncbi.nlm.nih.gov/bioproject/PRJNA542423>).

371

## 372 **RESULTS**

373

### 374 **Performance evaluation using mock microbial community**

375 The total DNA and 16S rRNA gene copy yields from mock community samples showed no  
376 significant differences between the MetaSUB method and the other two methods (Figure 2; Table  
377 2A). However, the MetaSUB method obtained a higher 16S rRNA gene copy yield than Jiang  
378 with borderline significance ( $P = 0.055$ ; Figure 2; Table 2A). The 12 mock community samples  
379 that were subjected to SMS showed similar distributions of all ten microbial species in the mock



380 community across the three methods, with MetaSUB and Zymobiomics being nearly identical  
381 (Figure 3).

382

### 383 **Performance evaluation using subway air samples**

384 The total DNA and 16S rRNA gene copy yields from subway air samples showed that the  
385 MetaSUB method obtained significantly higher total DNA and 16S rRNA gene copy yields than  
386 both Jiang and Zymobiomics (all  $P < 0.001$ ; Figure 4; Table 2B).

387 The subway air samples that had been isolated with the MetaSUB method resulted in  
388 higher numbers of assigned reads than both Jiang (5 017 442 v. 2 630 115) and Zymobiomics  
389 (5 085 947 v. 4 601 016). Note that these results are average numbers from six individual air  
390 samples that were split and processed with the different method pairs, MetaSUB (N=3) v. Jiang  
391 (N=3) and MetaSUB (N=3) v. Zymobiomics (N=3). All samples reached saturation with regard  
392 to  $\alpha$ -diversity at the lowest common assigned read depth (1 160 976, Figure S1), which was the  
393 depth at which all samples were rarified to. Taxonomic distributions at the family level were  
394 highly similar between the samples processed with MetaSUB and Zymobiomics (Figure 5). The  
395 samples processed with MetaSUB and Jiang were also highly similar, but a skew was observed in  
396 the relative abundances for two of the three Jiang samples (Figure 5). In the MetaSUB v.  
397 Zymobiomics comparison, the top ten most abundant phyla were identical between the method  
398 pairs, but not identical in their ordering by abundance (Table 3). Of the top ten families, one was  
399 uniquely found in the MetaSUB results (*Staphylococcaceae*; lowest abundance) and one in the  
400 Zymobiomics results (*Rhodobacteraceae*; second lowest abundance; Table 3). Among the ten top  
401 genera, only two were unique for MetaSUB (*Hymenobacter* and *Staphylococcus*) and two for  
402 Zymobiomics (*Dietzia* and *Paracoccus*; Table 3). Among the top ten species in each group, only  
403 one was unique to MetaSUB (*Chlorogloea* sp. CCALA 695) and one to Zymobiomics

404 (*Lecanicillium* sp. *LECO1*; Table 3). In the MetaSUB v. Jiang comparison, there were more  
405 pronounced differences. The top ten phyla were not identical; *Acidobacteria* was only found in  
406 the MetaSUB results and *Planctomycetes* only in the Jiang results (Table 4). The top ten families  
407 were identical (but not in ordering); however, Jiang reported a substantially higher relative  
408 abundance of the family that was most abundant for both methods (*Micrococcaceae*, MetaSUB:  
409 14% and Jiang: 25.6%; Table 4). Among the ten top genera, two were unique for MetaSUB  
410 (*Corynebacterium* and *Hymenobacter*) and two for Jiang (*Dietzia* and *Marmoricola*; Table 4).  
411 Here, the most abundant genus in Jiang (*Micrococcus*: 11.7%) was not the most abundant in  
412 MetaSUB (second most abundant; 5.60%) Among the top ten species in each group, only five  
413 species were present in both MetaSUB and Jiang results (Table 4).

414         Linear regression of within-sample  $\alpha$ -diversity indices showed that MetaSUB reported  
415 significantly higher diversity estimates compared to Zymobiomics (Observed:  $est=734.3$ ,  $P=0.01$ ;  
416 Shannon:  $est=0.22$ ,  $P=0.002$ ; Simpson:  $est=0.00079$ ,  $P=0.001$ ; Figure 6), but no differences were  
417 shown between MetaSUB and Jiang  $\alpha$ -diversity estimates (Observed:  $est=6531$ ; Shannon:  
418  $est=2.75$ ; Simpson:  $est=0.028$ ; all  $P>0.12$ ; Figure 6). PERMANOVA tests of PCoA ordinated  
419 Bray Curtis distances found no significant differences among MetaSUB and Jiang ( $P=0.1$ ) or  
420 MetaSUB and Zymobiomics ( $P=0.1$ ; Figure 7).

421         The random forest classification analysis, where species-level features were scored by  
422 their ability to correctly classify the DNA isolation method used, had a perfect out-of-bag error of  
423 0%, and a significant permutation test ( $P>0.02$ ) for MetaSUB v. Zymobiomics. For MetaSUB v.  
424 Jiang, the classification model had an out-of-bag error of 16%, but also here the permutation test  
425 was significant ( $P=0.01$ ). For MetaSUB v. Zymobiomics, the proportions of archaea, bacteria and  
426 fungi across the dataset and in the 100 species most important for correctly classifying samples as  
427 either MetaSUB or Zymobiomics were highly similar. However, for MetaSUB v. Jiang, 6.0% of

428 all assigned species were fungi, while among the 100 species most important for classification,  
429 20 were fungi. These 20 fungal species all had higher abundances in the MetaSUB results (Figure  
430 S4). The top 30 most important features for both classification models are shown in Figure 8.

431

#### 432 **DNA distribution in intermediate pellet/supernatant fractions of the MetaSUB method**

433 The distribution of DNA in terms of both amount and composition (diversity) in the intermediate  
434 pellet and supernatant fractions of the MetaSUB method was investigated by separately isolating  
435 DNA from the two fractions from subway air samples. The results revealed that the supernatant  
436 fraction contained  $42\% \pm 6$  of the total DNA yield and  $32\% \pm 12$  of the total 16S rRNA gene copy  
437 yield (Figure S2).

438 The SMS results showed that the pellet samples had a higher number of assigned reads  
439 than supernatant samples (2 584 159 v. 1 609 457). Rarefaction plots of pellet and supernatant  
440 samples indicated that  $\alpha$ -diversity indices (particularly Shannon and Simpson) reached saturation  
441 before the lowest common assigned read depth (453 218, Figure S2), which was the depth at  
442 which all samples were rarified to. The taxonomic distributions in pellet and supernatant samples  
443 were largely similar (Table 5; Figure 9). The top ten phyla were identical in the pellet and  
444 supernatant group, but not identical in their ordering by abundance (Table 5). Of the top ten  
445 families, one was uniquely found in the pellet group (*Rhodobacteraceae*; second lowest  
446 abundance) and one only in the supernatant group (*Deinococcaceae*; lowest abundance; Table 5).  
447 Among the ten top genera, only one was unique for the pellet group (*Marmoricola*) and one for  
448 the supernatant group (*Deinococcus*; Table 5). Among the top ten species in each group, seven  
449 species were present in both (Table 5). Linear regression of within-sample  $\alpha$ -diversity indices  
450 revealed no significant differences between pellet and supernatant samples (Figure 10; all  
451  $P > 0.38$ ). A PERMANOVA test of PCoA ordinated Bray Curtis distances found that whether

452 samples were pellet or supernatant explained 51.7% of the among-sample variance in diversity  
453 (Figure 11;  $P=0.004$ ).

454 The cross-kingdom analysis revealed substantial differences in the relative representation  
455 of almost all examined groups (archaea, bacteria, fungi, plants, human, and other animals)  
456 between the pellet and supernatant samples (Figure 12). While very few reads were assigned to  
457 archaea, only pellet samples had any coverage within this group. Pellet samples also had a higher  
458 relative number of assigned reads across all sample pairs within bacteria and fungi. The  
459 supernatant had a higher relative number of reads assigned as human and other animals, while  
460 plants saw similar representation in pellet and supernatant samples.

461 The random forest classification analysis, where species-level features were scored by  
462 their ability to correctly classify the pellet and supernatant groups, had a perfect out-of-bag error  
463 of 0%, and the permutation test was statistically significant ( $P>0.001$ ). In the entire dataset, 6.0%  
464 of the features were assigned as fungi and 0.3% were assigned as archaea, while among the 100  
465 species with the highest variable importance in our classification model, 56 were fungi and two  
466 were archaea. Among the top 50 species, 30 were fungi and one archaea. The top 30 most  
467 important features are shown in Figure 13.

468

## 469 **DISCUSSION**

470

471 Here, we have demonstrated a new custom, multi-component DNA isolation method (“the  
472 MetaSUB method”) optimized for SMS-based aerosol microbiome research. By processing the  
473 entire filter extract, in combination with thorough chemical, enzymatic and mechanical lysis and  
474 DNA purification using magnetic beads, the MetaSUB method drastically improves the DNA  
475 yield from low biomass air samples and reduces the risk of introducing microbiome profile bias.

476 Comprehensive performance benchmarking of the MetaSUB method against two other state-of-  
477 the-art DNA isolation methods was done with both a mock microbial community and real-world  
478 subway air samples. The benchmarking revealed that the MetaSUB method obtains significantly  
479 higher DNA yields from subway air samples than the other two methods, which is an important  
480 performance parameter for successful implementation of SMS on low biomass air samples. SMS  
481 of subway air samples revealed that the MetaSUB method resulted in higher numbers of assigned  
482 reads than the other two methods, reported higher diversity than Zymbiomics, and gave better  
483 representation of certain fungal species than Jiang. All three DNA isolation methods performed  
484 similarly well on mock microbial community samples, both in terms of DNA yield and  
485 community representation. As part of this study, we have also described an end-to-end air  
486 sampling, filter processing and DNA isolation method (“the end-to-end MetaSUB method”)  
487 optimized for SMS-based aerosol microbiome research. The end-to-end MetaSUB method relies  
488 on the use of SASS 3100 high-volume electret microfibrinous filter-based air samplers and was  
489 shown to be capable of recovering sufficient DNA yields from short-duration subway air  
490 samples, which corresponded to  $\sim 8 \text{ m}^3$  of air sampled (30 minutes sampling at 265 LPM) in this  
491 study, to facilitate high temporal resolution SMS-based aerosol microbiome investigations.

492 The performance evaluation of the three DNA isolation methods (MetaSUB, Jiang and  
493 Zymbiomics) revealed no significant differences regarding total DNA and 16S rRNA gene copy  
494 yields when isolating DNA from mock microbial community samples (Figure 2). Furthermore,  
495 SMS of mock community samples showed that the three methods gave highly similar  
496 representation of the ten microbial species present in the mock community (Figure 3). However,  
497 on subway air samples, the MetaSUB method outperformed both Jiang and Zymbiomics  
498 regarding total DNA and 16S rRNA gene copy yields (Figure 4). SMS analyses of subway air  
499 samples that had been split and isolated with either MetaSUB and Jiang or MetaSUB and

500 Zymbiomics revealed significant differences among the three methods. The numbers of  
501 assigned reads were higher for MetaSUB in both comparisons, which is congruent with the  
502 higher DNA yields seen for the MetaSUB method (Figure 4). We also observed significantly  
503 higher  $\alpha$ -diversity estimates for MetaSUB compared to Zymbiomics (Figure 6). One of the three  
504 samples processed with Jiang showed higher  $\alpha$ -diversity than all three MetaSUB samples, while  
505 the other two Jiang samples showed substantially lower diversity estimates (Figure 6), which  
506 rendered the comparison against MetaSUB non-significant for all  $\alpha$ -diversity indices. We have no  
507 conclusive explanation for this pattern; however, we observed that the two low-scoring Jiang  
508 samples had high duplicate sequence read proportions (62.4% and 71.8%) compared to all other  
509 samples (average: 18.6%), and postulate that the variable performance may be related to the  
510 recovery of insufficient DNA yields from two of the Jiang samples to allow for reliable SMS.  
511 Furthermore, the random forest classification analysis indicates that the Jiang method does not  
512 produce the same representation for certain fungal species as the MetaSUB method, since out of  
513 the 100 most important species for distinguishing between MetaSUB and Jiang processed  
514 samples, 20 were fungal, while across the entire dataset, only 6% of the species were fungal. All  
515 of these 20 fungal species had higher representation in MetaSUB samples (Figure S4).

516 Our findings highlight the importance of benchmarking DNA isolation methods with both  
517 mock communities and real-world samples since the complexity found in the real-world  
518 environment is not easily recreated. The observed DNA yield differences among the three  
519 methods can probably be attributed to a combination of sub-process efficiency differences, since  
520 the methods rely on different combinations of lysis (chemical, enzymatic, and/or mechanical),  
521 inhibitor removal and sample clean-up, and DNA purification (magnetic beads and silica spin  
522 filters) principles (Table 1). During customization of DNA isolation methods it is therefore  
523 important to keep in mind that even subtle procedural differences, including choice of bead

524 solution, intensity and time settings for the bead beating process [47, 48], and different enzyme  
525 combinations, may have a large effect on the ultimate biomass lysis efficiency [31]. By replacing  
526 the spin columns in the PowerSoil Kit with AMPure XP Beads (magnetic bead purification),  
527 Jiang et al. [28] observed a three-fold increase in DNA yield. The multi-component MetaSUB  
528 method was developed by adopting and customizing sub-processes from several different DNA  
529 isolation methods in an effort to ensure maximized DNA recovery and thorough unbiased  
530 biomass lysis. Note that for the performance benchmarking of DNA isolation methods in this  
531 study, only the intermediate pellet fraction of the MetaSUB method was used to facilitate an  
532 equal comparison between the three different DNA isolation methods (Figure 1). The  
533 intermediate supernatant fraction would normally also be included in the MetaSUB method and  
534 would have constituted approximately 72% of additional DNA, thereby making the DNA yield  
535 differences even more pronounced.

536         Since the filter extraction procedure in the MetaSUB method produces intermediate pellet  
537 and supernatant fraction that are combined before DNA purification, we investigated differences  
538 in DNA amount and composition (diversity) between the two fractions in an effort to better  
539 understand the benefit of including supernatants (i.e., increased DNA yield) and the risk of not  
540 including them (i.e., microbiome profile bias). The observed microbial diversity in paired pellet  
541 and supernatant samples was highly similar at the phylum (Table 5), family (Table 5; Figure 9),  
542 genus (Table 5) and species (Table 5) levels. Note, however, with direct examination of only the  
543 most abundant taxonomic groups in Table 5 and Figure 9, the similarities do not necessarily  
544 extend to groups with low abundance. While we did not find any differences among the pellet  
545 and supernatant samples in  $\alpha$ -diversity (Figure 10), which describes within-sample diversity,  
546 there was significant diversity nested among samples, of which the pellet/supernatant grouping  
547 explained 51.7% (Figure 11). The cross-kingdom analyses revealed differences in the taxonomic



548 composition of pellet and supernatant samples (Figure 12). While human DNA constituted a  
549 relatively large proportion of eukaryotic reads, it did not account for all of the difference  
550 observed among pellet and supernatant samples within this kingdom; on average, human reads  
551 constituted 18% of assigned reads in pellets and 42% in supernatants based on the cross-kingdom  
552 analysis (Figure 12). Human reads reported by One Codex also had a higher relative abundance  
553 in supernatants (31% and 67% of assigned reads in pellets and supernatants, respectively).  
554 Features assigned as archaea were exclusively observed in pellets; however, caution should be  
555 used when interpreting these results, since only eleven features were assigned to this kingdom.  
556 The random forest classification model revealed that fungi were particularly important in  
557 separating pellet and supernatant samples, especially when accounting for the relatively low  
558 representation of fungi across all samples. A recent study by Mbareche et al. has shown that the  
559 use of traditional processing methods, e.g., filter extract processing where the supernatant  
560 fraction is discarded after a centrifugation step, may lead to an underrepresentation of fungi [49].  
561 In conclusion, concerning the most abundant microbial groups and within-sample diversity  
562 estimates, there is little difference between the pellet and supernatant fractions. However, the  
563 between-sample diversity analyses show that potentially important diversity may be lost if the  
564 entire filter extract is not processed, and that an appreciable amount of this diversity is nested in  
565 fungi. In addition, a more general but potentially important reason for processing the entire filter  
566 extract in the context of high-volume filter-collected air samples is the variable resistance  
567 different types of microorganisms have against sampling-associated stress factors. While stress-  
568 resistant microorganisms may be relatively unaffected by sampling-associated stress, stress-  
569 sensitive organisms, e.g. Gram-negative bacteria, may become membrane-impaired, ruptured or  
570 even completely lysed due to sampling-associated desiccation during high-volume dry filter  
571 collection and subsequent osmotic shock during liquid filter extraction. DNA that becomes



572 liberated from membrane-impaired, ruptured or lysed microorganisms will generally not be  
573 recovered by standard centrifugation or filtration processes intended for intact organism capture,  
574 and may therefore remain in the supernatant or filtrate fraction.

575       Taken together, the demonstrated performance of the MetaSUB method, including  
576 drastically improved DNA yield from subway air samples and reduced risk of microbiome profile  
577 bias, highlights the benefit of isolating DNA from the entire filter extract. However, the need for  
578 isolating DNA from a relatively large sample volume, a 10 ml filter extract in this work, limits  
579 the available selection of out-of-the-box commercial DNA isolation kits and introduces a  
580 customization need to ensure reliable performance regarding thorough unbiased biomass lysis,  
581 sufficient inhibitor removal and sample clean-up, and efficient DNA recovery. The custom,  
582 multi-component MetaSUB method is therefore a relatively hands-on (manual), labor-intensive  
583 DNA isolation method compared to many out-of-the-box commercial DNA isolation kits.  
584 However, an experienced operator can perform the MetaSUB method, including all processing  
585 and incubation steps, in approximately three hours, while the estimated total processing time for  
586 12 air samples is approximately four hours. Furthermore, even without considering the associated  
587 benefits of isolating DNA from the entire filter extract, the use of a custom, multi-component  
588 DNA isolation method, including extensively modified commercial DNA isolation kits, appears  
589 to be necessary to overcome the unique and inherent challenges associated with SMS-based  
590 aerosol microbiome research in complex low biomass air environments [2, 21, 28, 29].

591

## 592 **CONCLUSIONS**

593

594 By demonstrating and benchmarking a new custom, multi-component DNA isolation method (the  
595 MetaSUB method) optimized for SMS-based aerosol microbiome research, this study contributes

596 to improved selection, harmonization, and standardization of DNA isolation methods. In the  
597 context of SMS-based aerosol microbiome research in low biomass air environments, our  
598 findings highlight the importance of ensuring end-to-end sample integrity and using DNA  
599 isolation methods with well-defined performance characteristics regarding both DNA yield and  
600 community representation. A comprehensive performance benchmarking of the MetaSUB  
601 method against two other state-of-the-art DNA isolation methods (Jiang and Zymobiomics) was  
602 done with both a mock microbial community and real-world subway air samples. All three DNA  
603 isolation methods performed similarly well on mock community samples, both in terms of DNA  
604 yield and community representation. However, the MetaSUB method obtained significantly  
605 higher DNA yields than the other two methods from subway air samples, which is an important  
606 performance parameter for successful implementation of SMS on low biomass air samples. We  
607 also observed significant differences regarding SMS-based community representation across the  
608 three methods when applying them to subway air samples. The MetaSUB method reported higher  
609  $\alpha$ -diversity estimates than Zymobiomics, while Jiang appeared to underrepresent certain fungal  
610 species. By processing the entire filter extract, in combination with thorough chemical, enzymatic  
611 and mechanical biomass lysis, and efficient DNA recovery using magnetic beads, the MetaSUB  
612 method may drastically improve the DNA yield from low biomass air samples and reduce the risk  
613 of aerosol microbiome profile bias. Taken together, the demonstrated performance characteristics  
614 suggest the MetaSUB method could be used to improve the quality of SMS-based aerosol  
615 microbiome research in low biomass air environments. Furthermore, the MetaSUB method, when  
616 used in combination with the described high-volume filter-based air sampling, filter processing  
617 and DNA isolation scheme (the end-to-end MetaSUB method), could be used to improve the  
618 temporal resolution in aerosol microbiome research by reducing the sampling time required to  
619 obtain sufficient DNA yields for SMS analysis.

620

621 **DECLARATIONS**

622

623 **Ethics approval and consent to participate**

624 Not applicable

625

626 **Consent for publication**

627 Not applicable

628

629 **Availability of data and material**

630 The sequence data has been deposited in the NCBI Sequence Read Archive under Bioproject ID#

631 PRJNA542423 (<https://www.ncbi.nlm.nih.gov/bioproject/PRJNA542423>).

632

633 **Competing interests**

634 The authors declare that they have no competing interests.

635

636 **Funding**

637 The study was funded by the Norwegian Defence Research Establishment FFI.

638

639 **Authors' contributions**

640 MD conceived, designed and led the study. JG performed the data analysis. LV-M contributed to

641 the experimental work and the data analysis. KO-B performed the experimental work and

642 contributed to the data analysis. All authors contributed to the manuscript writing and approved

643 the final manuscript.

644

## 645 **Acknowledgements**

646 The sequencing service was provided by the Norwegian Sequencing Centre  
647 ([www.sequencing.uio.no](http://www.sequencing.uio.no)), a national technology platform hosted by the University of Oslo and  
648 supported by the “Functional Genomics” and “Infrastructure” programs of the Research Council  
649 of Norway and the Southeastern Regional Health Authorities.

650

## 651 **REFERENCES**

652

- 653 1. Yao M: **Bioaerosol: A bridge and opportunity for many scientific research fields.**  
654 *Journal of Aerosol Science* 2018, **115**:108-112,  
655 <http://dx.doi.org/10.1016/j.jaerosci.2017.07.010>.
- 656 2. King P, Pham LK, Waltz S, Sphar D, Yamamoto RT, Conrad D, Taplitz R, Torriani F,  
657 Forsyth RA: **Longitudinal Metagenomic Analysis of Hospital Air Identifies Clinically**  
658 **Relevant Microbes.** *Plos One* 2016, **11**(8):e0160124,  
659 <http://dx.doi.org/10.1371/journal.pone.0160124>.
- 660 3. Choi JY, Zemke J, Philo SE, Bailey ES, Yondon M, Gray GC: **Aerosol Sampling in a**  
661 **Hospital Emergency Room Setting: A Complementary Surveillance Method for the**  
662 **Detection of Respiratory Viruses.** *Frontiers in Public Health* 2018, **6**:174-174,  
663 <http://dx.doi.org/10.3389/fpubh.2018.00174>.
- 664 4. Nguyen TT, Poh MK, Low J, Kalimuddin S, Thoon KC, Ng WC, Anderson BD, Gray  
665 GC: **Bioaerosol Sampling in Clinical Settings: A Promising, Noninvasive Approach**  
666 **for Detecting Respiratory Viruses.** *Open forum infectious diseases* 2017, **4**(1):ofw259,  
667 <http://dx.doi.org/10.1093/ofid/ofw259>.

- 668 5. Prost K, Kloeze H, Mukhi S, Bozek K, Poljak Z, Mubareka S: **Bioaerosol and surface**  
669 **sampling for the surveillance of influenza A virus in swine.** *Transboundary and*  
670 *emerging diseases* 2019, <http://dx.doi.org/10.1111/tbed.13139>.
- 671 6. Osman S, La Duc MT, Dekas A, Newcombe D, Venkateswaran K: **Microbial burden**  
672 **and diversity of commercial airline cabin air during short and long durations of**  
673 **travel.** *International Society for Microbial Ecology (ISME) Journal* 2008, **2**:482-497,  
674 <http://dx.doi.org/10.1038/ismej.2008.11>.
- 675 7. Weiss H, Hertzberg VS, Dupont C, Espinoza JL, Levy S, Nelson K, Norris S, Team TFR:  
676 **The Airplane Cabin Microbiome.** *Microbial Ecology* 2019, **77**(1):87-95,  
677 <http://dx.doi.org/10.1007/s00248-018-1191-3>.
- 678 8. Zanni S, Lalli F, Foschi E, Bonoli A, Mantecchini L: **Indoor Air Quality Real-Time**  
679 **Monitoring in Airport Terminal Areas: An Opportunity for Sustainable**  
680 **Management of Micro-Climatic Parameters.** *Sensors* 2018, **18**(11):3798,  
681 <http://dx.doi.org/10.3390/s18113798>.
- 682 9. Wagar E: **Bioterrorism and the Role of the Clinical Microbiology Laboratory.**  
683 *Clinical Microbiology Reviews* 2016, **29**(1):175-189,  
684 <http://dx.doi.org/10.1128/CMR.00033-15>.
- 685 10. Amann RI, Ludwig W, Schleifer K-H: **Phylogenetic identification and in situ detection**  
686 **of individual microbial cells without cultivation.** *Microbiology and Molecular Biology*  
687 *Reviews* 1995, **59**(1):143-169,
- 688 11. Radosevich JL, Wilson WJ, Shinn JH, DeSantis TZ, Andersen GL: **Development of a**  
689 **high-volume aerosol collection system for the identification of air-borne micro-**  
690 **organisms.** *Lett Appl Microbiol* 2002, **34**(3):162-167, [http://dx.doi.org/10.1046/j.1472-](http://dx.doi.org/10.1046/j.1472-765x.2002.01048.x)  
691 [765x.2002.01048.x](http://dx.doi.org/10.1046/j.1472-765x.2002.01048.x).

- 692 12. Toivola M, Alm S, Reponen T, Kolari S, Nevalainen A: **Personal exposures and**  
693 **microenvironmental concentrations of particles and bioaerosols.** *J Environ Monit*  
694 2002, **4**(1):166-174,
- 695 13. Eduard W, Heederik D: **Methods for quantitative assessment of airborne levels of**  
696 **noninfectious microorganisms in highly contaminated work environments.** *American*  
697 *Industrial Hygiene Association Journal* 1998, **59**(2):113-127,  
698 <http://dx.doi.org/10.1080/15428119891010370>.
- 699 14. Leung MH, Wilkins D, Li EK, Kong FK, Lee PK: **Indoor-air microbiome in an urban**  
700 **subway network: diversity and dynamics.** *Appl Environ Microb* 2014, **80**(21):6760-  
701 6770, <http://dx.doi.org/10.1128/AEM.02244-14>.
- 702 15. Triado-Margarit X, Veillette M, Duchaine C, Talbot M, Amato F, Minguillon MC,  
703 Martins V, de Miguel E, Casamayor EO, Moreno T: **Bioaerosols in the Barcelona**  
704 **subway system.** *Indoor Air* 2017, **27**(3):564-575, <http://dx.doi.org/10.1111/ina.12343>.
- 705 16. Cáliz J, Triadó-Margarit X, Camarero L, Casamayor EO: **A long-term survey unveils**  
706 **strong seasonal patterns in the airborne microbiome coupled to general and regional**  
707 **atmospheric circulations.** *Proceedings of the National Academy of Sciences* 2018,  
708 **115**(48):12229-12234, <http://dx.doi.org/10.1073/pnas.1812826115>.
- 709 17. Hanson B, Zhou Y, Bautista EJ, Urch B, Speck M, Silverman F, Muilenberg M,  
710 Phipatanakul W, Weinstock G, Sodergren E *et al*: **Characterization of the bacterial and**  
711 **fungal microbiome in indoor dust and outdoor air samples: a pilot study.**  
712 *Environmental Science: Processes & Impacts* 2016, **18**(6):713-724,  
713 <http://dx.doi.org/10.1039/c5em00639b>.

- 714 18. The Human Microbiome Project Consortium: **Structure, function and diversity of the**  
715 **healthy human microbiome.** *Nature* 2012, **486**:207-214,  
716 <http://dx.doi.org/10.1038/nature11234>.
- 717 19. Afshinnekoo E, Meydan C, Chowdhury S, Jaroudi D, Boyer C, Bernstein N, Maritz JM,  
718 Reeves D, Gandara J, Chhangawala S *et al*: **Geospatial Resolution of Human and**  
719 **Bacterial Diversity with City-Scale Metagenomics.** *Cell Systems* 2015, **1**(1):72-87,  
720 <http://dx.doi.org/10.1016/j.cels.2015.01.001>.
- 721 20. Biller SJ, Berube PM, Dooley K, Williams M, Satinsky BM, Hackl T, Hogle SL, Coe A,  
722 Bergauer K, Bouman HA *et al*: **Marine microbial metagenomes sampled across space**  
723 **and time.** *Scientific data* 2018, **5**:180176, <http://dx.doi.org/10.1038/sdata.2018.176>.
- 724 21. Yooseph S, Andrews-Pfannkoch C, Tenney A, McQuaid J, Williamson S, Thiagarajan M,  
725 Bami D, Zeigler-Allen L, Hoffman J, Goll JB *et al*: **A Metagenomic Framework for**  
726 **the Study of Airborne Microbial Communities.** *Plos One* 2013, **8**(12):e81862,  
727 <http://dx.doi.org/10.1371/journal.pone.0081862>.
- 728 22. Cao C, Jiang W, Wang B, Fang J, Lang J, Tian G, Jiang J, Zhu TF: **Inhalable**  
729 **microorganisms in Beijing's PM2.5 and PM10 pollutants during a severe smog**  
730 **event.** *Environmental Science & Technology* 2014, **48**(3):1499-1507,  
731 <http://dx.doi.org/10.1021/es4048472>.
- 732 23. Eisenhofer R, Minich JJ, Marotz C, Cooper A, Knight R, Weyrich LS: **Contamination in**  
733 **Low Microbial Biomass Microbiome Studies: Issues and Recommendations.** *Trends*  
734 *Microbiol* 2019, **27**(2):105-117,  
735 <http://dx.doi.org/https://doi.org/10.1016/j.tim.2018.11.003>.
- 736 24. Dybwad M, Skogan G, Blatny JM: **Comparative Testing and Evaluation of Nine**  
737 **Different Air Samplers: End-to-End Sampling Efficiencies as Specific Performance**

- 738           **Measurements for Bioaerosol Applications.** *Aerosol Science and Technology* 2014,  
739           **48(3):282-295,** <http://dx.doi.org/10.1080/02786826.2013.871501>.
- 740   25.   Behzad H, Gojobori T, Mineta K: **Challenges and opportunities of airborne**  
741           **metagenomics.** *Genome Biology and Evolution* 2015, **7(5):1216-1226,**  
742           <http://dx.doi.org/10.1093/gbe/evv064>.
- 743   26.   Tringe SG, Hugenholtz P: **A renaissance for the pioneering 16S rRNA gene.** *Current*  
744           *opinion in microbiology* 2008, **11(5):442-446,**  
745           <http://dx.doi.org/10.1016/j.mib.2008.09.011>.
- 746   27.   Luhung I, Wu Y, Ng CK, Miller D, Cao B, Chang VW: **Protocol Improvements for**  
747           **Low Concentration DNA-Based Bioaerosol Sampling and Analysis.** *Plos One* 2015,  
748           **10(11):e0141158,** <http://dx.doi.org/10.1371/journal.pone.0141158>.
- 749   28.   Jiang W, Liang P, Wang B, Fang J, Lang J, Tian G, Jiang J, Zhu TF: **Optimized DNA**  
750           **extraction and metagenomic sequencing of airborne microbial communities.** *Nature*  
751           *Protocols* 2015, **10:768,** <http://dx.doi.org/10.1038/nprot.2015.046>.
- 752   29.   Dommergue A, Amato P, Tignat-Perrier R, Magand O, Thollot A, Joly M, Bouvier L,  
753           Sellegrì K, Vogel T, Sonke JE *et al*: **Methods to Investigate the Global Atmospheric**  
754           **Microbiome.** *Frontiers in Microbiology* 2019, **10:00243,**  
755           <http://dx.doi.org/10.3389/fmicb.2019.00243>.
- 756   30.   Tighe S, Afshinnekoo E, Rock TM, McGrath K, Alexander N, McIntyre A, Ahsanuddin  
757           S, Bezdan D, Green SJ, Joye S *et al*: **Genomic Methods and Microbiological**  
758           **Technologies for Profiling Novel and Extreme Environments for the Extreme**  
759           **Microbiome Project (XMP).** *Journal of Biomolecular Techniques* 2017, **28(1):31-39,**  
760           <http://dx.doi.org/10.7171/jbt.17-2801-004>.



- 761 31. Yuan S, Cohen DB, Ravel J, Abdo Z, Forney LJ: **Evaluation of methods for the**  
762 **extraction and purification of DNA from the human microbiome.** *Plos One* 2012,  
763 **7(3):e33865**, <http://dx.doi.org/10.1371/journal.pone.0033865>.
- 764 32. Abusleme L, Hong BY, Dupuy AK, Strausbaugh LD, Diaz PI: **Influence of DNA**  
765 **extraction on oral microbial profiles obtained via 16S rRNA gene sequencing.**  
766 *Journal of Oral Microbiology* 2014, **6:23990**, <http://dx.doi.org/10.3402/jom.v6.23990>.
- 767 33. Mbareche H, Brisebois E, Veillette M, Duchaine C: **Bioaerosol sampling and detection**  
768 **methods based on molecular approaches: No pain no gain.** *Science of The Total*  
769 *Environment* 2017, **599–600:2095-2104**,  
770 <http://dx.doi.org/10.1016/j.scitotenv.2017.05.076>.
- 771 34. The Human Microbiome Project Consortium: **A framework for human microbiome**  
772 **research.** *Nature* 2012, **486:215-221**, <http://dx.doi.org/10.1038/nature11209>.
- 773 35. Gilbert JA, Jansson JK, Knight R: **Earth Microbiome Project and Global Systems**  
774 **Biology.** *mSystems* 2018, **3(3):e00217**, <http://dx.doi.org/10.1128/mSystems.00217-17>.
- 775 36. Kopf A, Bicak M, Kottmann R, Schnetzer J, Kostadinov I, Lehmann K, Fernandez-  
776 Guerra A, Jeanthon C, Rahav E, Ullrich M *et al*: **The ocean sampling day consortium.**  
777 *GigaScience* 2015, **4(1):s13742**, <http://dx.doi.org/10.1186/s13742-015-0066-5>.
- 778 37. Lear G, Dickie I, Banks J, Boyer S, Buckley HL, Buckley TR, Cruickshank R, Dopheide  
779 A, Handley KM, Hermans S *et al*: **Methods for the extraction, storage, amplification**  
780 **and sequencing of DNA from environmental samples.** *New Zealand Journal of*  
781 *Ecology* 2018, **42(1):10-50**, <http://dx.doi.org/10.20417/nzjecol.42.9>.
- 782 38. Al-Hebshi NN, Baraniya D, Chen T, Hill J, Puri S, Tellez M, Hasan NA, Colwell RR,  
783 Ismail A: **Metagenome sequencing-based strain-level and functional characterization**  
784 **of supragingival microbiome associated with dental caries in children.** *Journal of*

- 785 *Oral Microbiology* 2018, **11**(1):1557986,  
786 <http://dx.doi.org/10.1080/20002297.2018.1557986>.
- 787 39. Honeyman AS, Day ML, Spear JR: **Regional fresh snowfall microbiology and**  
788 **chemistry are driven by geography in storm-tracked events, Colorado, USA.** *PeerJ*  
789 2018, **6**:e5961, <http://dx.doi.org/10.7717/peerj.5961>.
- 790 40. Zaikova E, Goerlitz DS, Tighe SW, Wagner NY, Bai Y, Hall BL, Bevilacqua JG, Weng  
791 MM, Samuels-Fair MD, Johnson SS: **Antarctic Relic Microbial Mat Community**  
792 **Revealed by Metagenomics and Metatranscriptomics.** *Frontiers in Ecology and*  
793 *Evolution* 2019, **7**(1):10.3389, <http://dx.doi.org/10.3389/fevo.2019.00001>.
- 794 41. Trivedi CB, Lau GE, Grasby SE, Templeton AS, Spear JR: **Low-Temperature Sulfidic-**  
795 **Ice Microbial Communities, Borup Fiord Pass, Canadian High Arctic.** *Frontiers in*  
796 *Microbiology* 2018, **9**:01622, <http://dx.doi.org/10.3389/fmicb.2018.01622>.
- 797 42. Liu CM, Aziz M, Kachur S, Hsueh P-R, Huang Y-T, Keim P, Price LB: **BactQuant: an**  
798 **enhanced broad-coverage bacterial quantitative real-time PCR assay.** *BMC*  
799 *Microbiol* 2012, **12**:56-56, <http://dx.doi.org/10.1186/1471-2180-12-56>.
- 800 43. Minot SS, Krumm N, Greenfield NB: **One Codex: A Sensitive and Accurate Data**  
801 **Platform for Genomic Microbial Identification.** *bioRxiv* 2015:027607,  
802 <http://dx.doi.org/10.1101/027607>.
- 803 44. McMurdie PJ, Holmes S: **phyloseq: an R package for reproducible interactive**  
804 **analysis and graphics of microbiome census data.** *PloS one* 2013, **8**(4):e61217,
- 805 45. Huson DH, Auch AF, Qi J, Schuster SC: **MEGAN analysis of metagenomic data.**  
806 *Genome Res* 2007, **17**(3):377-386,
- 807 46. Liaw A, Wiener M: **Classification and regression by randomForest.** *R news* 2002,  
808 **2**(3):18-22,

- 809 47. Miller DN, Bryant JE, Madsen EL, Ghiorse WC: **Evaluation and optimization of DNA**  
810 **extraction and purification procedures for soil and sediment samples.** *Appl Environ*  
811 *Microb* 1999, **65**(11):4715-4724,
- 812 48. Griffiths LJ, Anyim M, Doffman SR, Wilks M, Millar MR, Agrawal SG: **Comparison of**  
813 **DNA extraction methods for *Aspergillus fumigatus* using real-time PCR.** *Journal of*  
814 *Medical Microbiology* 2006, **55**(9):1187-1191, <http://dx.doi.org/10.1099/jmm.0.46510-0>.
- 815 49. Mbareche H, Veillette M, Teertstra W, Kegel W, Bilodeau GJ, Wösten HAB, Duchaine  
816 **C: Fungal Cells Recovery From Air Samples: A Tale of Loss And Gain.** *Appl Environ*  
817 *Microb* 2019:02941, <http://dx.doi.org/10.1128/aem.02941-18>.
- 818  
819  
820  
821  
822  
823  
824  
825  
826  
827  
828  
829  
830  
831  
832

833 **TABLES AND FIGURES**

834

835 **Table 1** - Overview of the three DNA isolation methods evaluated in this work.

| Method                                                                                                               | MetaSUB                                                                                   | Jiang                                                                                                                     | Zymobiomics                                                                  |
|----------------------------------------------------------------------------------------------------------------------|-------------------------------------------------------------------------------------------|---------------------------------------------------------------------------------------------------------------------------|------------------------------------------------------------------------------|
| <b>Common processing steps</b><br>(used to generate equal aerosol biomass aliquots for paired difference comparison) |                                                                                           |                                                                                                                           |                                                                              |
| Filter extraction (filter-to-liquid)                                                                                 | NucliSENS lysis buffer                                                                    |                                                                                                                           |                                                                              |
| Lysis (enzymatic)                                                                                                    | MetaPolyzyme multi-enzyme cocktail                                                        |                                                                                                                           |                                                                              |
| <b>Method-specific processing steps</b><br>(used for paired difference comparison on equal aerosol biomass aliquots) |                                                                                           |                                                                                                                           |                                                                              |
| Lysis (mechanical)                                                                                                   | ZR BashingBead Tubes with PowerSoil Bead Solution and Solution C1. Bead beating for 3 min | PowerSoil Bead Tubes with PowerSoil Bead Solution and Solution C1 incubated at 65°C for 15 min. Bead vortexing for 15 min | ZR BashingBead Tubes with Zymobiomics lysis solution. Bead beating for 3 min |
| Inhibitor removal and sample clean-up                                                                                | PowerSoil Solution C2 and C3                                                              | PowerSoil Solution C2 and C3                                                                                              | Zymo-Spin IV and Zymo-Spin IV-μHRC Columns                                   |
| DNA purification                                                                                                     | NucliSENS magnetic beads                                                                  | AMPure XP magnetic beads                                                                                                  | Zymo-Spin IC-Z Column                                                        |

836

837

838

839

840

841

842

843

844

845 **Table 2** – Benchmarking results for MetaSUB, Jiang, and Zymobiomics on mock microbial  
 846 community and subway air samples.

| A) Mock microbial community       |                           |        |                 |       |    |       |
|-----------------------------------|---------------------------|--------|-----------------|-------|----|-------|
| Measure                           | Within-sample differences | Est    | 95% CI          | T     | df | P     |
| Total DNA yield (ng)              | MetaSUB – Jiang           | -3     | [-28.5 , 22.5]  | -0.37 | 3  | 0.73  |
|                                   | MetaSUB – Zymobiomics     | -7     | [-46.5, 32.5]   | -0.45 | 5  | 0.67  |
| 16S rRNA gene copy yield (copies) | MetaSUB – Jiang           | 17107  | [-634, 34848]   | 3.07  | 3  | 0.055 |
|                                   | MetaSUB – Zymobiomics     | -11452 | [-83155, 60251] | -0.41 | 5  | 0.70  |

  

| B) Subway air samples             |                           |      |              |      |    |         |
|-----------------------------------|---------------------------|------|--------------|------|----|---------|
| Measure                           | Within-sample differences | Est  | 95% CI       | T    | df | P       |
| Total DNA yield (ng)              | MetaSUB – Jiang           | 1.07 | [0.77, 1.37] | 8.01 | 9  | < 0.001 |
|                                   | MetaSUB – Zymobiomics     | 1.35 | [0.86, 1.85] | 5.94 | 13 | < 0.001 |
| 16S rRNA gene copy yield (copies) | MetaSUB – Jiang           | 5046 | [3882, 6211] | 9.80 | 9  | < 0.001 |
|                                   | MetaSUB – Zymobiomics     | 3451 | [1741, 5162] | 4.36 | 13 | < 0.001 |

847  
 848 One-sample t-test on within-sample differences ( $H_0$ : difference in within-sample measurements =  
 849 0) for different method pairs with mock microbial community (A) and subway air samples (B).  
 850 Measures from Jiang/Zymobiomics were subtracted from the MetaSUB measures: the estimate  
 851 (*est*) gives the departure from zero of the resultant values (larger than zero values indicate that  
 852 MetaSUB had a higher yield than Jiang/Zymobiomics).

853

854

855

856

857

858

859

860

861

862 **Table 3** – Abundant microbial taxa in subway air samples (MetaSUB v. Zymobiomics method).

| MetaSUB v. Zymobiomics            |            |       |           |                                   |            |       |           |
|-----------------------------------|------------|-------|-----------|-----------------------------------|------------|-------|-----------|
| MetaSub                           |            |       |           | Zymobiomics                       |            |       |           |
| Phylum                            | prevalence |       | abundance | Phylum                            | prevalence |       | Abundance |
|                                   | mean       | total |           |                                   | mean       | total |           |
| <i>Actinobacteria</i>             | 2.7        | 9271  | 51.61 %   | <i>Actinobacteria</i>             | 2.7        | 9301  | 57.72 %   |
| <i>Proteobacteria</i>             | 2.3        | 14269 | 27.02 %   | <i>Proteobacteria</i>             | 2.2        | 13421 | 23.67 %   |
| <i>Firmicutes</i>                 | 1.6        | 3250  | 4.76 %    | <i>Ascomycota</i>                 | 2.5        | 1899  | 4.91 %    |
| <i>Bacteroidetes</i>              | 2.0        | 2999  | 4.74 %    | <i>Basidiomycota</i>              | 2.4        | 622   | 4.75 %    |
| <i>Ascomycota</i>                 | 2.4        | 1843  | 4.42 %    | <i>Firmicutes</i>                 | 1.3        | 2705  | 3.30 %    |
| <i>Basidiomycota</i>              | 2.3        | 606   | 3.84 %    | <i>Bacteroidetes</i>              | 1.5        | 2257  | 2.77 %    |
| <i>Cyanobacteria</i>              | 2.3        | 526   | 1.35 %    | <i>Deinococcus-Thermus</i>        | 2.6        | 204   | 1.26 %    |
| <i>Deinococcus-Thermus</i>        | 2.5        | 196   | 1.23 %    | <i>Cyanobacteria</i>              | 1.9        | 432   | 0.66 %    |
| <i>Euryarchaeota</i>              | 1.7        | 450   | 0.62 %    | <i>Euryarchaeota</i>              | 1.5        | 393   | 0.58 %    |
| <i>Acidobacteria</i>              | 2.5        | 112   | 0.08 %    | <i>Acidobacteria</i>              | 2.6        | 114   | 0.08 %    |
| Family                            | prevalence |       | abundance | Family                            | prevalence |       | Abundance |
|                                   | mean       | total |           |                                   | mean       | total |           |
| <i>Micrococcaceae</i>             | 2.8        | 801   | 15.72 %   | <i>Micrococcaceae</i>             | 2.8        | 822   | 20.34 %   |
| <i>Nocardiodiaceae</i>            | 2.8        | 308   | 6.51 %    | <i>Nocardiodiaceae</i>            | 2.9        | 311   | 6.65 %    |
| <i>Microbacteriaceae</i>          | 2.6        | 1222  | 4.89 %    | <i>Microbacteriaceae</i>          | 2.6        | 1235  | 4.70 %    |
| <i>Sphingomonadaceae</i>          | 2.8        | 1006  | 3.88 %    | <i>Geodermatophilaceae</i>        | 3.0        | 150   | 4.24 %    |
| <i>Geodermatophilaceae</i>        | 3.0        | 150   | 3.67 %    | <i>Sphingomonadaceae</i>          | 2.8        | 1013  | 4.04 %    |
| <i>Moraxellaceae</i>              | 1.9        | 608   | 3.54 %    | <i>Intrasporangiaceae</i>         | 3.0        | 211   | 3.46 %    |
| <i>Intrasporangiaceae</i>         | 3.0        | 211   | 3.15 %    | <i>Corynebacteriaceae</i>         | 2.6        | 571   | 3.35 %    |
| <i>Comamonadaceae</i>             | 2.6        | 800   | 2.94 %    | <i>Comamonadaceae</i>             | 2.7        | 838   | 3.02 %    |
| <i>Corynebacteriaceae</i>         | 2.6        | 568   | 2.93 %    | <i>Rhodobacteraceae</i>           | 2.6        | 1484  | 2.28 %    |
| <i>Staphylococcaceae</i>          | 2.3        | 401   | 2.17 %    | <i>Moraxellaceae</i>              | 1.6        | 533   | 2.14 %    |
| Genus                             | prevalence |       | abundance | Genus                             | prevalence |       | Abundance |
|                                   | mean       | total |           |                                   | mean       | total |           |
| <i>Micrococcus</i>                | 2.9        | 29    | 7.27 %    | <i>Micrococcus</i>                | 2.9        | 29    | 9.34 %    |
| <i>Arthrobacter</i>               | 2.8        | 399   | 5.32 %    | <i>Arthrobacter</i>               | 2.9        | 413   | 6.44 %    |
| <i>Nocardioiodes</i>              | 2.8        | 176   | 3.51 %    | <i>Nocardioiodes</i>              | 2.9        | 177   | 3.57 %    |
| <i>Sphingomonas</i>               | 2.9        | 461   | 3.09 %    | <i>Kocuria</i>                    | 2.7        | 79    | 3.44 %    |
| <i>Corynebacterium</i>            | 2.6        | 568   | 2.93 %    | <i>Corynebacterium</i>            | 2.6        | 571   | 3.35 %    |
| <i>Psychrobacter</i>              | 2.0        | 141   | 2.85 %    | <i>Sphingomonas</i>               | 2.9        | 464   | 3.23 %    |
| <i>Blastococcus</i>               | 3.0        | 60    | 2.44 %    | <i>Blastococcus</i>               | 3.0        | 60    | 2.92 %    |
| <i>Staphylococcus</i>             | 2.2        | 308   | 2.02 %    | <i>Psychrobacter</i>              | 2.7        | 184   | 1.82 %    |
| <i>Kocuria</i>                    | 2.7        | 79    | 2.02 %    | <i>Dietzia</i>                    | 3.0        | 51    | 1.70 %    |
| <i>Hymenobacter</i>               | 2.9        | 98    | 1.92 %    | <i>Paracoccus</i>                 | 2.9        | 167   | 1.58 %    |
| Species                           | prevalence |       | abundance | Species                           | prevalence |       | Abundance |
|                                   | mean       | total |           |                                   | mean       | total |           |
| <i>Micrococcus luteus</i>         | 3.0        | 3     | 1.13 %    | <i>Micrococcus luteus</i>         | 3.0        | 3     | 1.44 %    |
| <i>Arthrobacter sp. H41</i>       | 3.0        | 3     | 1.00 %    | <i>Arthrobacter sp. H41</i>       | 3.0        | 3     | 1.38 %    |
| <i>Rubrobacter aphysinae</i>      | 3.0        | 3     | 0.78 %    | <i>Rubrobacter aphysinae</i>      | 3.0        | 3     | 0.97 %    |
| <i>Arthrobacter sp. Leaf234</i>   | 3.0        | 3     | 0.67 %    | <i>Arthrobacter sp. Leaf234</i>   | 3.0        | 3     | 0.89 %    |
| <i>Marmoricola sp. Leaf446</i>    | 3.0        | 3     | 0.65 %    | <i>Stereum hirsutum</i>           | 3.0        | 3     | 0.76 %    |
| <i>Chlorogloea sp. CCALA 695</i>  | 3.0        | 3     | 0.63 %    | <i>Marmoricola sp. Leaf446</i>    | 3.0        | 3     | 0.76 %    |
| <i>Deinococcus marmoris</i>       | 3.0        | 3     | 0.60 %    | <i>Fomitopsis pinicola</i>        | 3.0        | 3     | 0.68 %    |
| <i>Stereum hirsutum</i>           | 3.0        | 3     | 0.50 %    | <i>Blastococcus sp. DSM 44268</i> | 3.0        | 3     | 0.64 %    |
| <i>Blastococcus sp. DSM 44268</i> | 3.0        | 3     | 0.48 %    | <i>Deinococcus marmoris</i>       | 3.0        | 3     | 0.57 %    |
| <i>Fomitopsis pinicola</i>        | 3.0        | 3     | 0.45 %    | <i>Lecanicillium sp. LEC01</i>    | 3.0        | 3     | 0.57 %    |

863 Top ten microbial phyla, families, genera and species in subway air samples (N=3) that were split

864 and processed with the MetaSUB (N=3) and Zymobiomics (N=3) methods.

865

866

867

868

869 **Table 4** – Abundant microbial taxa in subway air samples (MetaSUB v. Jiang method).

| MetaSUB v. Jiang                  |            |       |           |                                   |            |       |           |
|-----------------------------------|------------|-------|-----------|-----------------------------------|------------|-------|-----------|
| MetaSub                           |            |       |           | Jiang                             |            |       |           |
| Phylum                            | prevalence |       | abundance | Phylum                            | prevalence |       | Abundance |
|                                   | mean       | total |           |                                   | mean       | total |           |
| <i>Actinobacteria</i>             | 2.7        | 9248  | 48.69 %   | <i>Actinobacteria</i>             | 1.1        | 3625  | 60.08 %   |
| <i>Proteobacteria</i>             | 2.3        | 14379 | 28.58 %   | <i>Proteobacteria</i>             | 1.0        | 6090  | 23.40 %   |
| <i>Ascomycota</i>                 | 2.4        | 1843  | 5.28 %    | <i>Firmicutes</i>                 | 0.7        | 1510  | 4.58 %    |
| <i>Bacteroidetes</i>              | 2.1        | 3148  | 5.10 %    | <i>Bacteroidetes</i>              | 0.9        | 1436  | 3.40 %    |
| <i>Firmicutes</i>                 | 1.6        | 3250  | 4.52 %    | <i>Ascomycota</i>                 | 1.1        | 822   | 2.78 %    |
| <i>Basidiomycota</i>              | 2.3        | 598   | 3.95 %    | <i>Deinococcus-Thermus</i>        | 1.0        | 77    | 1.94 %    |
| <i>Cyanobacteria</i>              | 2.3        | 518   | 1.44 %    | <i>Basidiomycota</i>              | 1.1        | 286   | 1.91 %    |
| <i>Deinococcus-Thermus</i>        | 2.4        | 190   | 1.35 %    | <i>Cyanobacteria</i>              | 1.1        | 243   | 1.50 %    |
| <i>Euryarchaeota</i>              | 1.9        | 495   | 0.63 %    | <i>Euryarchaeota</i>              | 0.9        | 231   | 0.15 %    |
| <i>Acidobacteria</i>              | 2.6        | 113   | 0.08 %    | <i>Planctomycetes</i>             | 1.2        | 52    | 0.04 %    |
| Family                            | prevalence |       | abundance | Family                            | prevalence |       | abundance |
|                                   | mean       | total |           |                                   | mean       | total |           |
| <i>Micrococcaceae</i>             | 2.7        | 785   | 13.96 %   | <i>Micrococcaceae</i>             | 1.2        | 336   | 25.63 %   |
| <i>Nocardiodaceae</i>             | 2.8        | 301   | 6.58 %    | <i>Nocardiodaceae</i>             | 1.1        | 123   | 7.02 %    |
| <i>Microbacteriaceae</i>          | 2.6        | 1213  | 5.05 %    | <i>Geodermatophilaceae</i>        | 1.3        | 65    | 4.77 %    |
| <i>Sphingomonadaceae</i>          | 2.8        | 1010  | 4.20 %    | <i>Microbacteriaceae</i>          | 1.0        | 486   | 4.45 %    |
| <i>Moraxellaceae</i>              | 2.0        | 655   | 4.12 %    | <i>Intrasporangiaceae</i>         | 1.4        | 97    | 4.15 %    |
| <i>Comamonadaceae</i>             | 2.4        | 750   | 3.68 %    | <i>Moraxellaceae</i>              | 0.9        | 289   | 4.05 %    |
| <i>Geodermatophilaceae</i>        | 3.0        | 149   | 3.59 %    | <i>Sphingomonadaceae</i>          | 1.0        | 357   | 3.92 %    |
| <i>Intrasporangiaceae</i>         | 3.0        | 210   | 3.23 %    | <i>Comamonadaceae</i>             | 1.1        | 337   | 2.60 %    |
| <i>Hymenobacteraceae</i>          | 2.9        | 182   | 2.17 %    | <i>Staphylococcaceae</i>          | 0.9        | 169   | 2.39 %    |
| <i>Flavobacteriaceae</i>          | 2.2        | 1594  | 2.04 %    | <i>Dietziaceae</i>                | 1.1        | 19    | 1.99 %    |
| Genus                             | prevalence |       | abundance | Genus                             | prevalence |       | abundance |
|                                   | mean       | total |           |                                   | mean       | total |           |
| <i>Arthrobacter</i>               | 2.7        | 391   | 5.63 %    | <i>Micrococcus</i>                | 2.1        | 21    | 11.69 %   |
| <i>Micrococcus</i>                | 2.8        | 28    | 5.60 %    | <i>Arthrobacter</i>               | 1.1        | 153   | 9.34 %    |
| <i>Nocardioides</i>               | 2.7        | 167   | 3.50 %    | <i>Kocuria</i>                    | 1.2        | 34    | 3.53 %    |
| <i>Psychrobacter</i>              | 1.9        | 131   | 3.40 %    | <i>Psychrobacter</i>              | 0.9        | 64    | 3.46 %    |
| <i>Sphingomonas</i>               | 2.9        | 465   | 3.38 %    | <i>Nocardioides</i>               | 1.0        | 61    | 3.38 %    |
| <i>Blastococcus</i>               | 3.0        | 59    | 2.30 %    | <i>Sphingomonas</i>               | 1.0        | 155   | 3.20 %    |
| <i>Corynebacterium</i>            | 2.6        | 559   | 2.04 %    | <i>Blastococcus</i>               | 1.3        | 26    | 3.16 %    |
| <i>Hymenobacter</i>               | 2.9        | 98    | 2.02 %    | <i>Marmoricola</i>                | 2.0        | 12    | 2.78 %    |
| <i>Staphylococcus</i>             | 2.0        | 289   | 1.77 %    | <i>Staphylococcus</i>             | 0.9        | 128   | 2.33 %    |
| <i>Kocuria</i>                    | 2.7        | 79    | 1.76 %    | <i>Dietzia</i>                    | 1.1        | 19    | 1.99 %    |
| Species                           | prevalence |       | abundance | Species                           | prevalence |       | abundance |
|                                   | mean       | total |           |                                   | mean       | total |           |
| <i>Arthrobacter sp. H41</i>       | 3.0        | 3     | 1.14 %    | <i>Arthrobacter sp. H41</i>       | 3.0        | 3     | 2.36 %    |
| <i>Micrococcus luteus</i>         | 3.0        | 3     | 0.88 %    | <i>Arthrobacter sp. Leaf234</i>   | 3.0        | 3     | 2.15 %    |
| <i>Chlorogloea sp. CCALEA 695</i> | 3.0        | 3     | 0.74 %    | <i>Marmoricola sp. Leaf446</i>    | 3.0        | 3     | 1.71 %    |
| <i>Rubrobacter aplysinae</i>      | 3.0        | 3     | 0.71 %    | <i>Deinococcus marmoris</i>       | 3.0        | 3     | 1.56 %    |
| <i>Arthrobacter sp. Leaf234</i>   | 3.0        | 3     | 0.71 %    | <i>Blastococcus sp. DSM 44268</i> | 3.0        | 3     | 1.24 %    |
| <i>Aspergillus sp. MA 6041</i>    | 3.0        | 3     | 0.69 %    | <i>Arthrobacter agilis</i>        | 3.0        | 3     | 1.23 %    |
| <i>Marmoricola sp. Leaf446</i>    | 3.0        | 3     | 0.67 %    | <i>Chlorogloea sp. CCALEA 695</i> | 3.0        | 3     | 1.14 %    |
| <i>Deinococcus marmoris</i>       | 3.0        | 3     | 0.66 %    | <i>Marmoricola scoriae</i>        | 3.0        | 3     | 0.84 %    |
| <i>Acidovorax temperans</i>       | 3.0        | 3     | 0.61 %    | <i>Janibacter sp. Soil728</i>     | 3.0        | 3     | 0.82 %    |
| <i>Stereum hirsutum</i>           | 3.0        | 3     | 0.57 %    | <i>Mrakia frigida</i>             | 3.0        | 3     | 0.77 %    |

870 Top ten microbial phyla, families, genera and species in subway air samples (N=3) that were split

871 and processed with the MetaSUB (N=3) and Jiang (N=3) methods.

872

873

874

875

876 **Table 5** – Abundant microbial taxa in pellet and supernatant fractions from subway air samples  
 877 (MetaSUB method).

| Supernatant                          |            |       |           | Pellet                            |            |       |           |
|--------------------------------------|------------|-------|-----------|-----------------------------------|------------|-------|-----------|
| Phylum                               | Prevalence |       | abundance | Phylum                            | Prevalence |       | abundance |
|                                      | mean       | Total |           |                                   | mean       | Total |           |
| <i>Actinobacteria</i>                | 3.5        | 9479  | 51.21%    | <i>Actinobacteria</i>             | 4.0        | 10653 | 53.53%    |
| <i>Proteobacteria</i>                | 3.1        | 14453 | 28.87%    | <i>Proteobacteria</i>             | 3.4        | 15894 | 24.50%    |
| <i>Bacteroidetes</i>                 | 2.8        | 3139  | 7.10%     | <i>Basidiomycota</i>              | 3.7        | 717   | 5.42%     |
| <i>Firmicutes</i>                    | 2.5        | 3816  | 4.23%     | <i>Ascomycota</i>                 | 4.2        | 2109  | 5.23%     |
| <i>Deinococcus-Thermus</i>           | 3.2        | 184   | 3.06%     | <i>Bacteroidetes</i>              | 2.9        | 3202  | 4.44%     |
| <i>Basidiomycota</i>                 | 1.5        | 290   | 1.86%     | <i>Firmicutes</i>                 | 2.6        | 3874  | 2.68%     |
| <i>Ascomycota</i>                    | 2.4        | 1231  | 1.62%     | <i>Deinococcus-Thermus</i>        | 3.7        | 214   | 2.05%     |
| <i>Cyanobacteria</i>                 | 2.8        | 431   | 1.47%     | <i>Cyanobacteria</i>              | 3.6        | 557   | 1.03%     |
| <i>Euryarchaeota</i>                 | 1.5        | 260   | 0.17%     | <i>Euryarchaeota</i>              | 2.1        | 367   | 0.66%     |
| <i>Acidobacteria</i>                 | 3.4        | 103   | 0.10%     | <i>Acidobacteria</i>              | 4.4        | 132   | 0.11%     |
| Supernatant                          |            |       |           | Pellet                            |            |       |           |
| Family                               | Prevalence |       | abundance | Family                            | Prevalence |       | abundance |
|                                      | mean       | Total |           |                                   | mean       | Total |           |
| <i>Micrococcaceae</i>                | 3.6        | 735   | 11.27%    | <i>Micrococcaceae</i>             | 3.9        | 795   | 14.70%    |
| <i>Nocardiodaceae</i>                | 3.1        | 236   | 9.32%     | <i>Nocardiodaceae</i>             | 3.0        | 222   | 8.26%     |
| <i>Microbacteriaceae</i>             | 3.4        | 921   | 5.24%     | <i>Geodermatophilaceae</i>        | 2.9        | 97    | 4.65%     |
| <i>Sphingomonadaceae</i>             | 3.8        | 1119  | 5.20%     | <i>Microbacteriaceae</i>          | 3.5        | 958   | 4.53%     |
| <i>Geodermatophilaceae</i>           | 3.7        | 121   | 4.60%     | <i>Sphingomonadaceae</i>          | 4.3        | 1260  | 4.22%     |
| <i>Moraxellaceae</i>                 | 2.9        | 794   | 4.14%     | <i>Intrasporangiaceae</i>         | 3.8        | 199   | 4.20%     |
| <i>Hymenobacteraceae</i>             | 3.5        | 150   | 3.93%     | <i>Moraxellaceae</i>              | 2.6        | 717   | 2.77%     |
| <i>Intrasporangiaceae</i>            | 3.7        | 192   | 3.81%     | <i>Corynebacteriaceae</i>         | 4.2        | 881   | 2.61%     |
| <i>Corynebacteriaceae</i>            | 3.7        | 789   | 3.77%     | <i>Rhodobacteraceae</i>           | 4.3        | 1698  | 2.33%     |
| <i>Deinococcaceae</i>                | 4.0        | 117   | 3.03%     | <i>Hymenobacteraceae</i>          | 3.8        | 163   | 2.15%     |
| Supernatant                          |            |       |           | Pellet                            |            |       |           |
| Genus                                | Prevalence |       | abundance | Genus                             | Prevalence |       | abundance |
|                                      | mean       | Total |           |                                   | mean       | Total |           |
| <i>Arthrobacter</i>                  | 3.3        | 320   | 6.31%     | <i>Arthrobacter</i>               | 3.7        | 357   | 7.74%     |
| <i>Sphingomonas</i>                  | 3.7        | 512   | 4.40%     | <i>Micrococcus</i>                | 3.9        | 39    | 4.19%     |
| <i>Nocardioiodes</i>                 | 3.0        | 127   | 3.87%     | <i>Sphingomonas</i>               | 4.1        | 560   | 3.40%     |
| <i>Hymenobacter</i>                  | 3.4        | 89    | 3.85%     | <i>Nocardioiodes</i>              | 2.9        | 120   | 3.14%     |
| <i>Corynebacterium</i>               | 3.8        | 767   | 3.73%     | <i>Blastococcus</i>               | 3.5        | 39    | 3.13%     |
| <i>Psychrobacter</i>                 | 2.5        | 143   | 3.24%     | <i>Corynebacterium</i>            | 4.2        | 854   | 2.59%     |
| <i>Deinococcus</i>                   | 4.0        | 117   | 3.03%     | <i>Marmoricola</i>                | 5.8        | 23    | 2.56%     |
| <i>Friedmanniella</i>                | 6.0        | 18    | 2.85%     | <i>Friedmanniella</i>             | 6.0        | 18    | 2.38%     |
| <i>Blastococcus</i>                  | 4.1        | 45    | 2.60%     | <i>Psychrobacter</i>              | 2.3        | 133   | 2.37%     |
| <i>Micrococcus</i>                   | 4.6        | 46    | 2.31%     | <i>Hymenobacter</i>               | 3.2        | 84    | 2.04%     |
| Supernatant                          |            |       |           | Pellet                            |            |       |           |
| Species                              | Prevalence |       | abundance | Species                           | Prevalence |       | abundance |
|                                      | mean       | Total |           |                                   | mean       | Total |           |
| <i>Deinococcus marmoris</i>          | 6.0        | 6     | 2.07%     | <i>Arthrobacter sp. H41</i>       | 6.0        | 6     | 2.07%     |
| <i>Arthrobacter sp. Leaf234</i>      | 6.0        | 6     | 1.91%     | <i>Micrococcus luteus</i>         | 6.0        | 6     | 1.96%     |
| <i>Marmoricola sp. Leaf446</i>       | 6.0        | 6     | 1.31%     | <i>Rubrobacter aplysinae</i>      | 6.0        | 6     | 1.52%     |
| <i>Friedmanniella flava</i>          | 6.0        | 6     | 1.05%     | <i>Arthrobacter sp. Leaf234</i>   | 6.0        | 6     | 1.51%     |
| <i>Friedmanniella sagamiharensis</i> | 6.0        | 6     | 1.03%     | <i>Marmoricola sp. Leaf446</i>    | 6.0        | 6     | 1.42%     |
| <i>Cutibacterium acnes</i>           | 6.0        | 6     | 1.02%     | <i>Blastococcus sp. DSM 44268</i> | 6.0        | 6     | 1.32%     |
| <i>Mrakia frigida</i>                | 6.0        | 6     | 1.02%     | <i>Deinococcus marmoris</i>       | 6.0        | 6     | 1.27%     |
| <i>Blastococcus sp. DSM 44268</i>    | 6.0        | 6     | 1.02%     | <i>Arthrobacter agilis</i>        | 6.0        | 6     | 0.95%     |
| <i>Micrococcus luteus</i>            | 6.0        | 6     | 1.01%     | <i>Friedmanniella flava</i>       | 6.0        | 6     | 0.89%     |
| <i>Arthrobacter sp. H41</i>          | 6.0        | 6     | 0.98%     | <i>Stereum hirsutum</i>           | 6.0        | 6     | 0.86%     |

878 Top ten microbial phyla, families, genera and species in the intermediate pellet (N=6) and  
 879 supernatant (N=6) fractions from subway air samples (N=6) processed with the MetaSUB  
 880 method.



881 **Figure 1** – Overview of the end-to-end MetaSUB method.

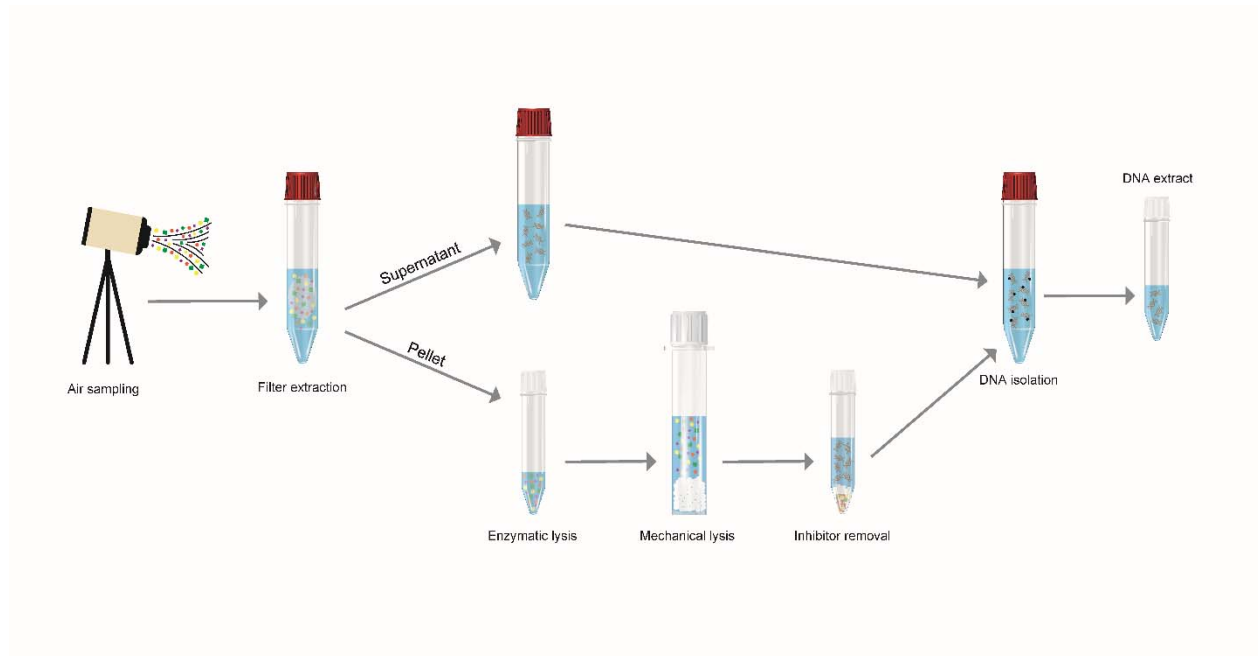

882 Air samples collected using SASS 3100 high-volume filter-based air samplers (Research  
883 International) on SASS 3100 electret microfibrinous filters (Research International) are extracted in  
884 NucliSENS lysis buffer (BioMérieux) and centrifuged, resulting in intermediate separation of the  
885 filter extract into a pellet and supernatant fraction. The pellet is subjected to additional lysis with  
886 MetaPolzyme (Sigma-Aldrich), a multi-enzyme cocktail, followed by bead beating with ZR  
887 Bashing Tubes (Zymo Research) filled with PowerSoil Bead Solution (Qiagen) and Solution C1  
888 (Qiagen). Inhibitor removal and sample clean-up is performed with Solution C2 and C3 (Qiagen).  
889 The supernatant and pellet fractions are recombined and DNA purification performed according  
890 to the manual protocol of the NucliSENS Magnetic Extraction Reagents kit (BioMérieux).

891

892

893

894

895

896 **Figure 2** – Benchmarking results for MetaSUB, Jiang, and Zymobiomics on mock microbial  
897 community samples.

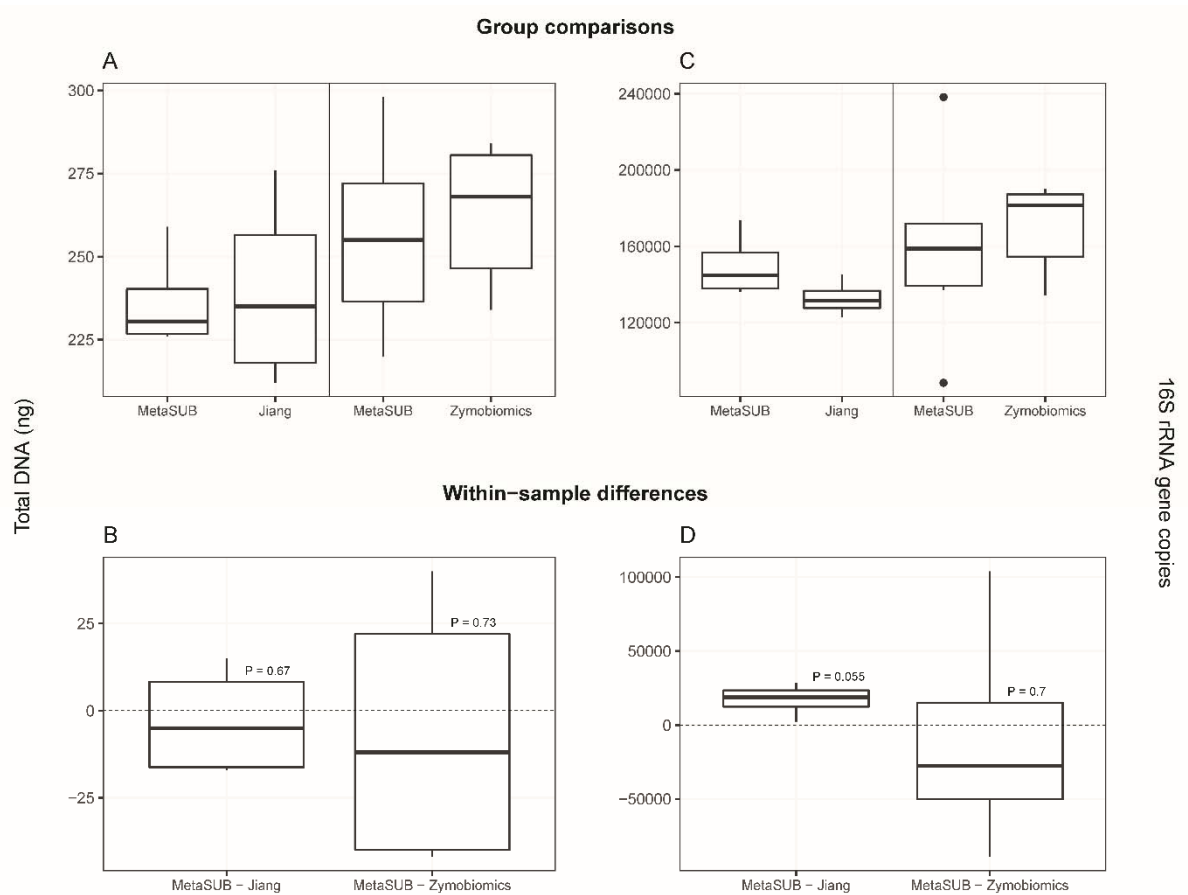

898 One sample t-tests were performed on within-sample differences (B, D) of total DNA yield (A),  
899 and 16S rRNA gene copy yield (C) for MetaSUB (N=4) and Jiang (N=4), and MetaSUB (N=6)  
900 and Zymobiomics (N=6).

901

902

903

904

905

906 **Figure 3** – Relative distribution of the ten mock microbial community species for MetaSUB,  
907 Jiang, and Zymbiomics.

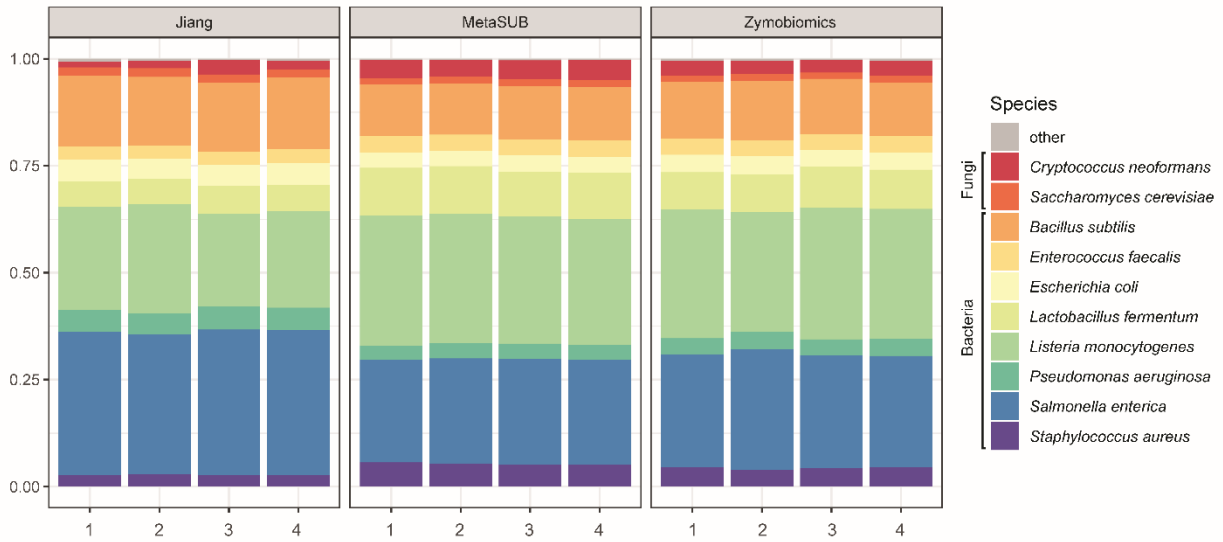

908

909

910

911

912

913

914

915

916

917

918

919

920

921

922 **Figure 4** – Benchmarking results for MetaSUB, Jiang, and Zymbiomics on split subway air  
923 samples.

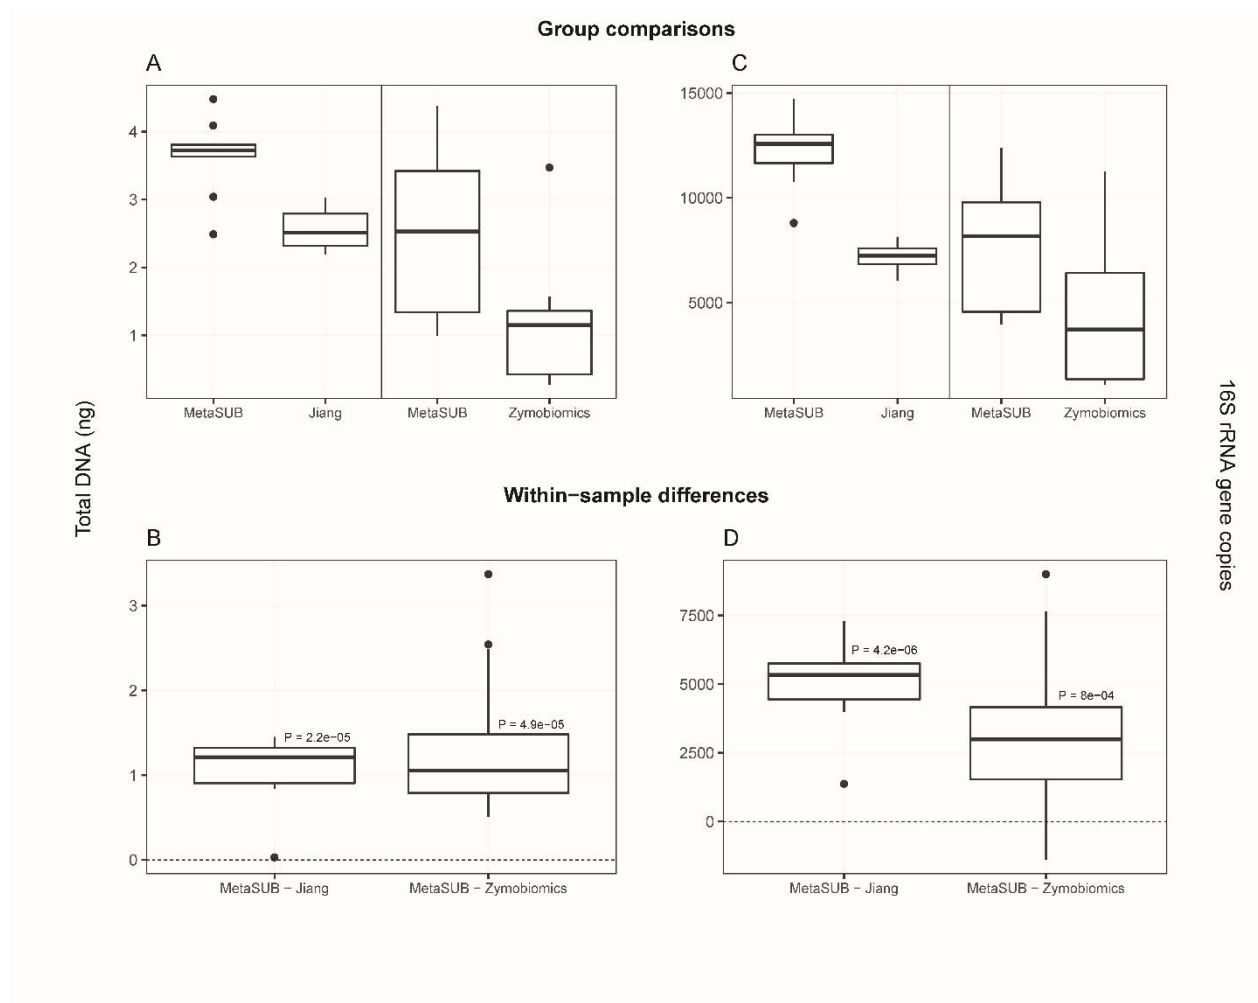

924 One sample t-tests were performed on within-sample differences (B, D) of total DNA yield (A),  
925 and 16S rRNA gene copy yield (C) for MetaSUB (N=10) and Jiang (N=10), and MetaSUB  
926 (N=14) and Zymbiomics (N=14).

927

928

929

930

931

932 **Figure 5** – Relative taxonomic (family-level) distribution in split subway air samples (MetaSUB  
933 v. Jiang, MetaSUB v. Zymbiomics).

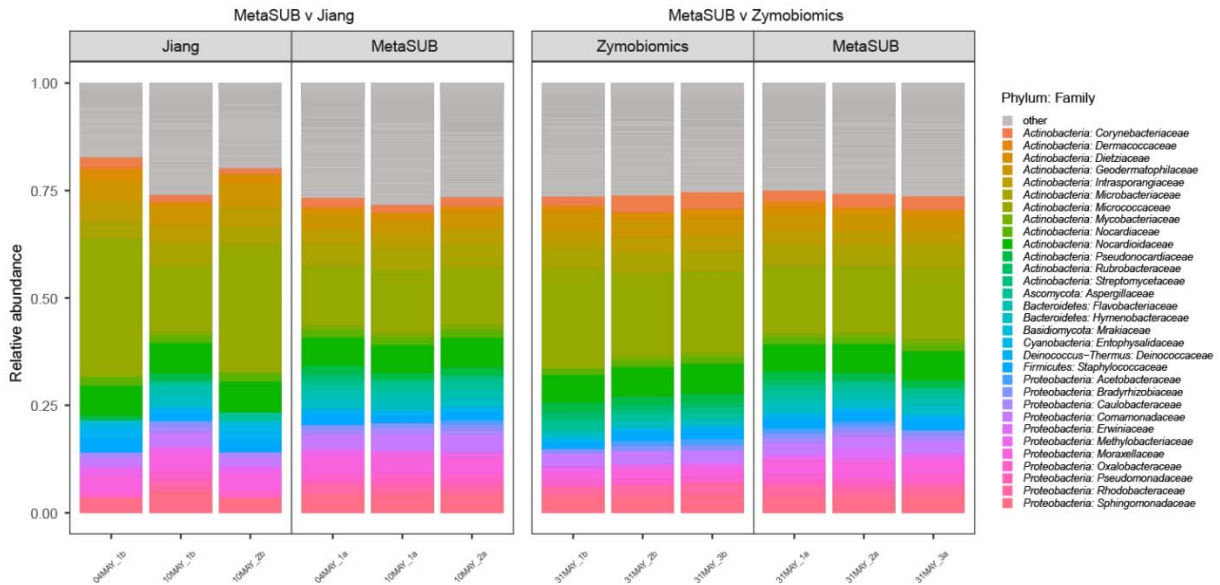

934  
935 Relative taxonomic (family-level) distribution in subway air samples (N=6) that were split and  
936 processed with the MetaSUB (N=3) and Jiang (N=3) or MetaSUB (N=3) and Zymbiomics  
937 (N=3) methods. Families with <1% representation are listed as “other”.

938  
939  
940  
941  
942  
943  
944  
945  
946  
947

948 **Figure 6** – Diversity estimates ( $\alpha$ -diversity) for split subway air samples (MetaSUB v. Jiang,  
949 MetaSUB v. Zymbiomics).

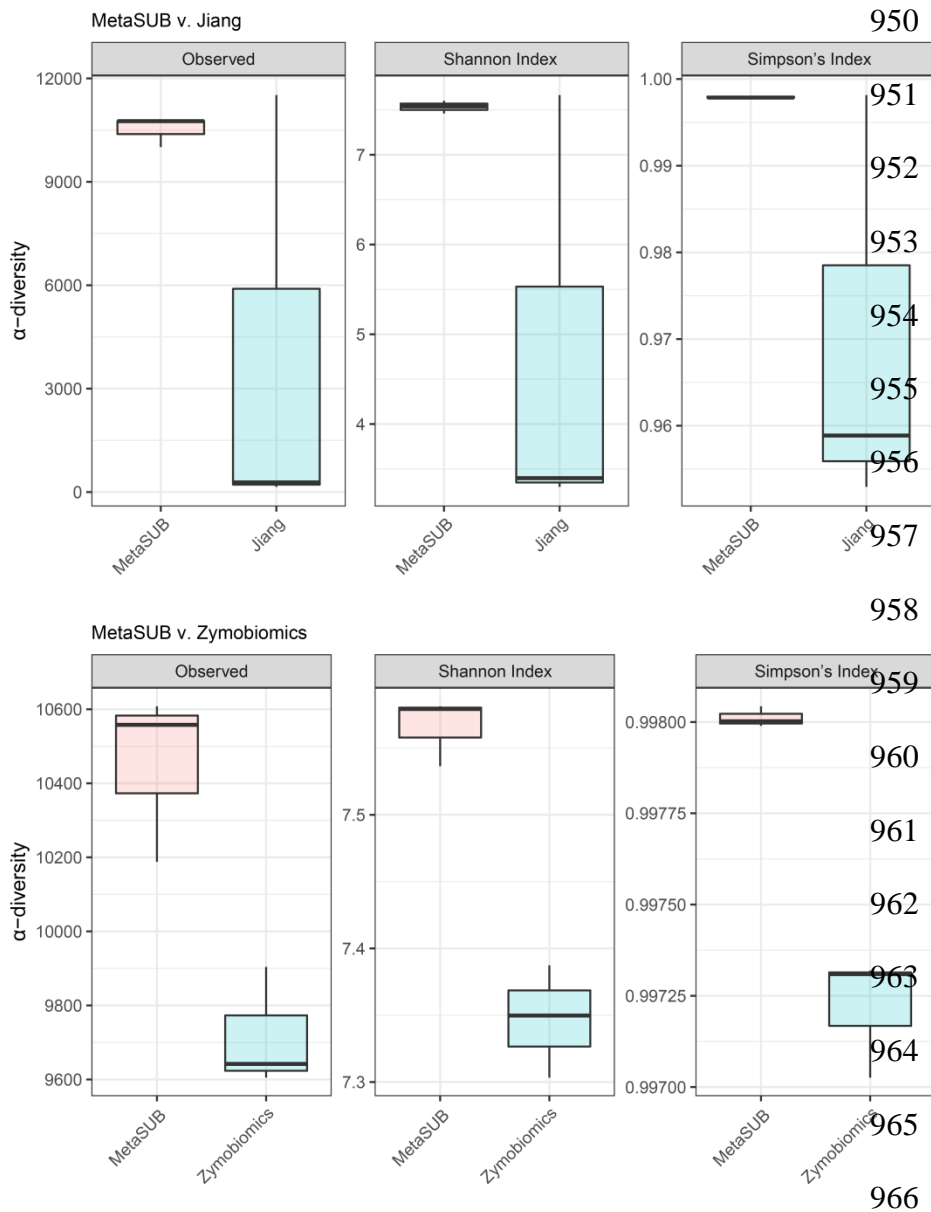

967 Comparison of diversity estimates ( $\alpha$ -diversity) for subway air samples (N=6) that were split and  
968 processed with the MetaSUB (N=3) and Jiang (N=3) or MetaSUB (N=3) and Zymbiomics  
969 (N=3) methods.

970

971

972 **Figure 7** – PCoA ordination plots ( $\beta$ -diversity) for split subway air samples (MetaSUB v. Jiang,  
973 MetaSUB v. Zymobiomics).

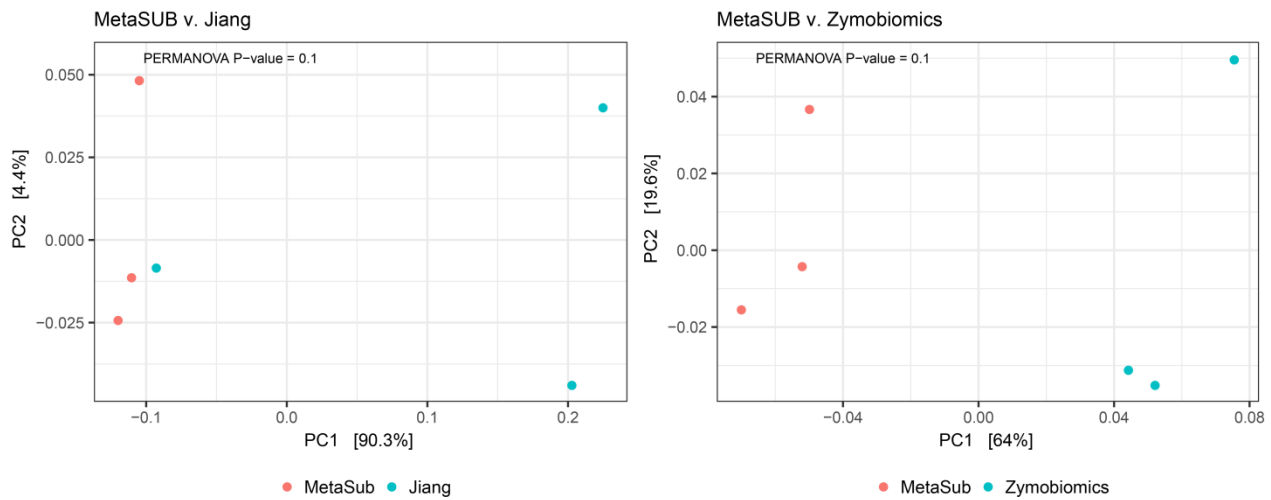

974 PCoA ordination plots using Bray Curtis distance estimation ( $\beta$ -diversity) for subway air samples  
975 (N=6) that were split and processed with the MetaSUB (N=3) and Jiang (N=3) or MetaSUB  
976 (N=3) and Zymobiomics (N=3) methods. PERMANOVA tests were performed on the  
977 MetaSUB/Jiang and MetaSUB/Zymobiomics groupings.

978

979

980

981

982

983

984

985

986

987

988

989 **Figure 8** – Random forest classification analysis of split subway air samples (MetaSUB v. Jiang,  
 990 MetaSUB v. Zymobiomics).

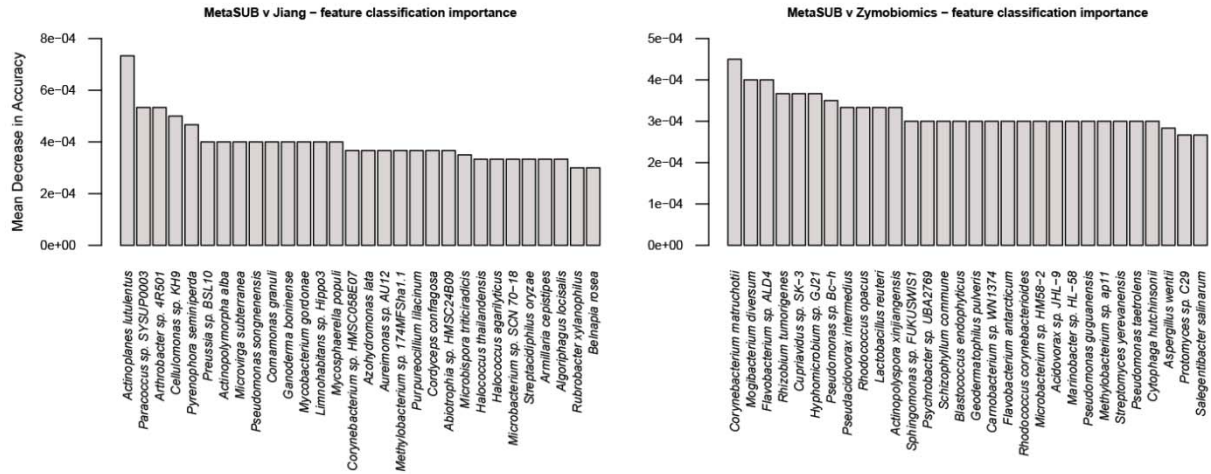

991  
 992 Random forest classification analysis of subway air samples (N=6) that were split and processed  
 993 with the MetaSUB (N=3) and Jiang (N=3) or MetaSUB (N=3) and Zymobiomics (N=3) methods,  
 994 showing taxonomic features with the highest classification variable importance for correctly  
 995 identifying the DNA isolation method.

996  
 997  
 998  
 999  
 1000  
 1001  
 1002  
 1003  
 1004  
 1005



1006 **Figure 9** – Relative taxonomic (family-level) distribution in pellet and supernatant fractions from  
1007 subway air samples (MetaSUB method).

1008

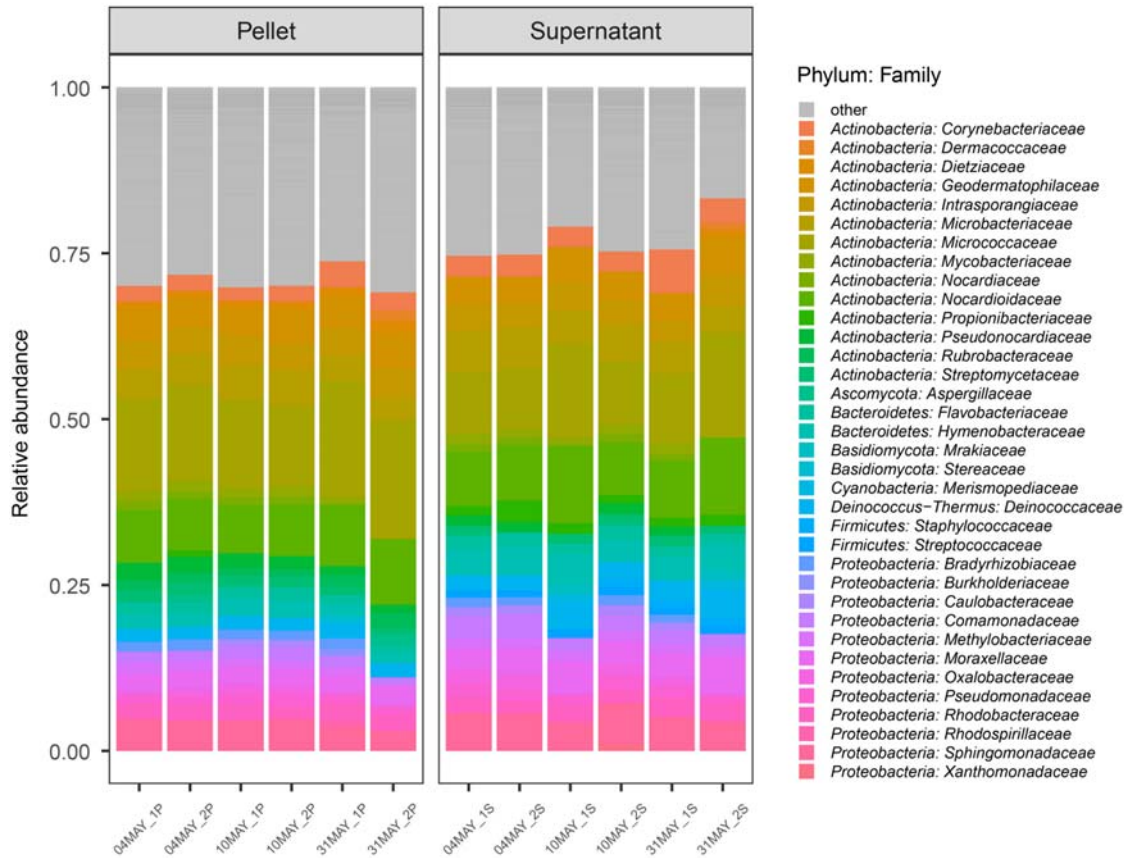

1009 Relative taxonomic (family-level) distribution for subway air samples (N=6) where the  
1010 intermediate pellet (N=6) and supernatant (N=6) fractions were processed separately with the  
1011 MetaSUB method. Families with <1% representation are listed as “other”.

1012

1013

1014

1015

1016

1017

1018 **Figure 10** – Diversity estimates ( $\alpha$ -diversity) for pellet and supernatant fractions from subway air  
1019 samples (MetaSUB method).

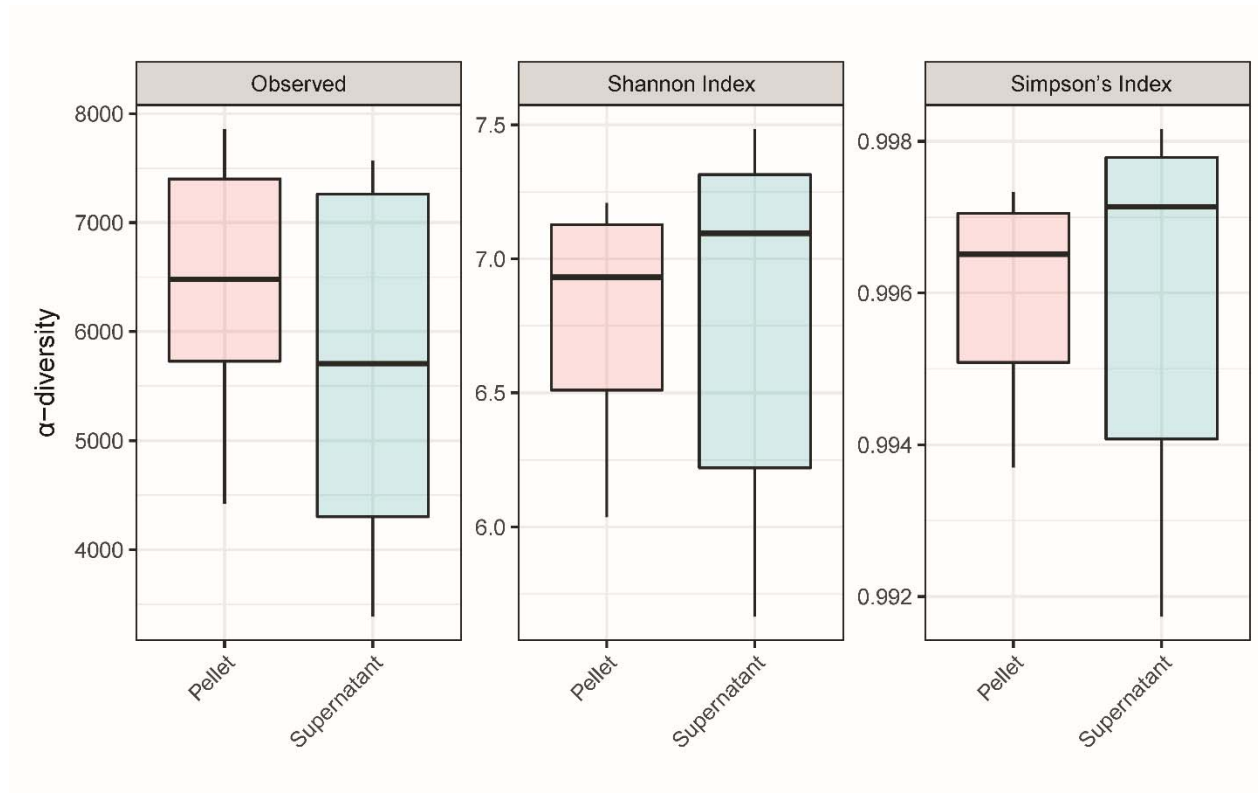

1020 Diversity estimates ( $\alpha$ -diversity) for subway air samples (N=6) where the intermediate pellet  
1021 (N=6) and supernatant (N=6) fractions were processed separately with the MetaSUB method.

1022

1023

1024

1025

1026

1027

1028

1029

1030

1031 **Figure 11** – PCoA ordination plot ( $\beta$ -diversity) for pellet and supernatant fractions from subway  
1032 air samples (MetaSUB method).

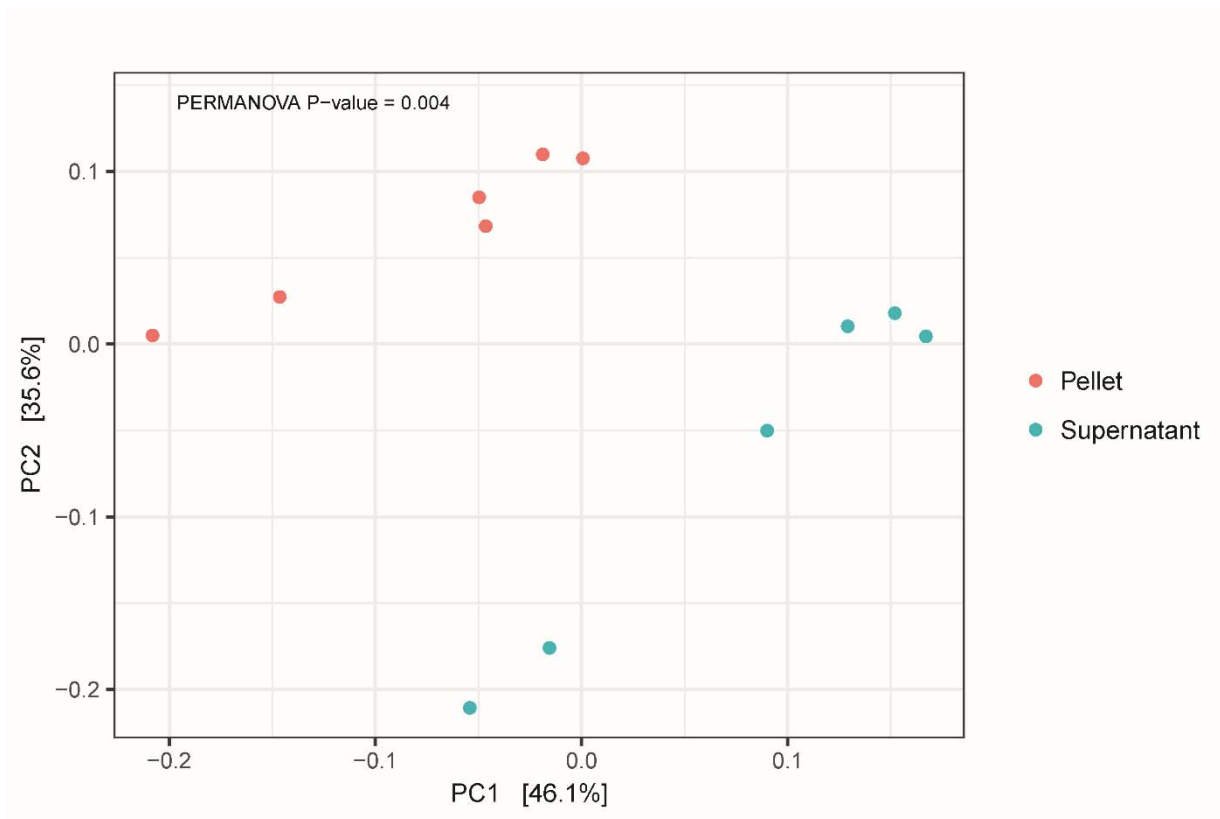

1033 PCoA ordination plot using Bray Curtis distance estimation ( $\beta$ -diversity) for subway air samples  
1034 (N=6) where the intermediate pellet (N=6) and supernatant (N=6) fractions were processed  
1035 separately with the MetaSUB method. PERMANOVA test was performed on pellet/supernatant  
1036 grouping.

1037

1038

1039

1040

1041

1042

1043

1044 **Figure 12** – Relative taxonomic (cross-kingdom) distribution in pellet and supernatant fractions  
1045 from subway air samples (MetaSUB method).

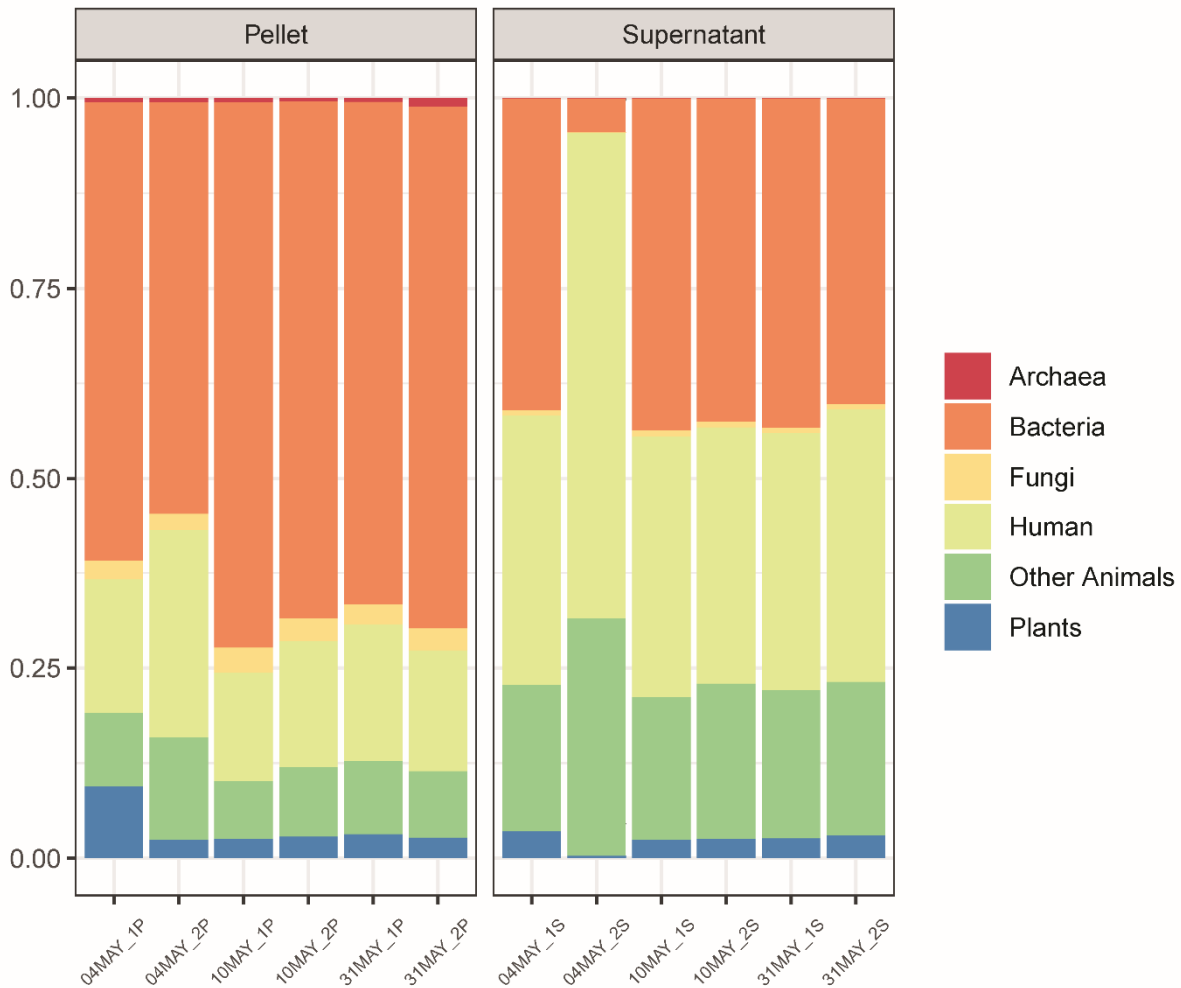

1046 Relative taxonomic (cross-kingdom) distribution for subway air samples (N=6) where the  
1047 intermediate pellet (N=6) and supernatant (N=6) fractions were processed separately with the  
1048 MetaSUB method.

1049

1050

1051

1052

1053 **Figure 13** – Random forest classification analysis on pellet and supernatant fractions from  
1054 subway air samples (MetaSUB method).

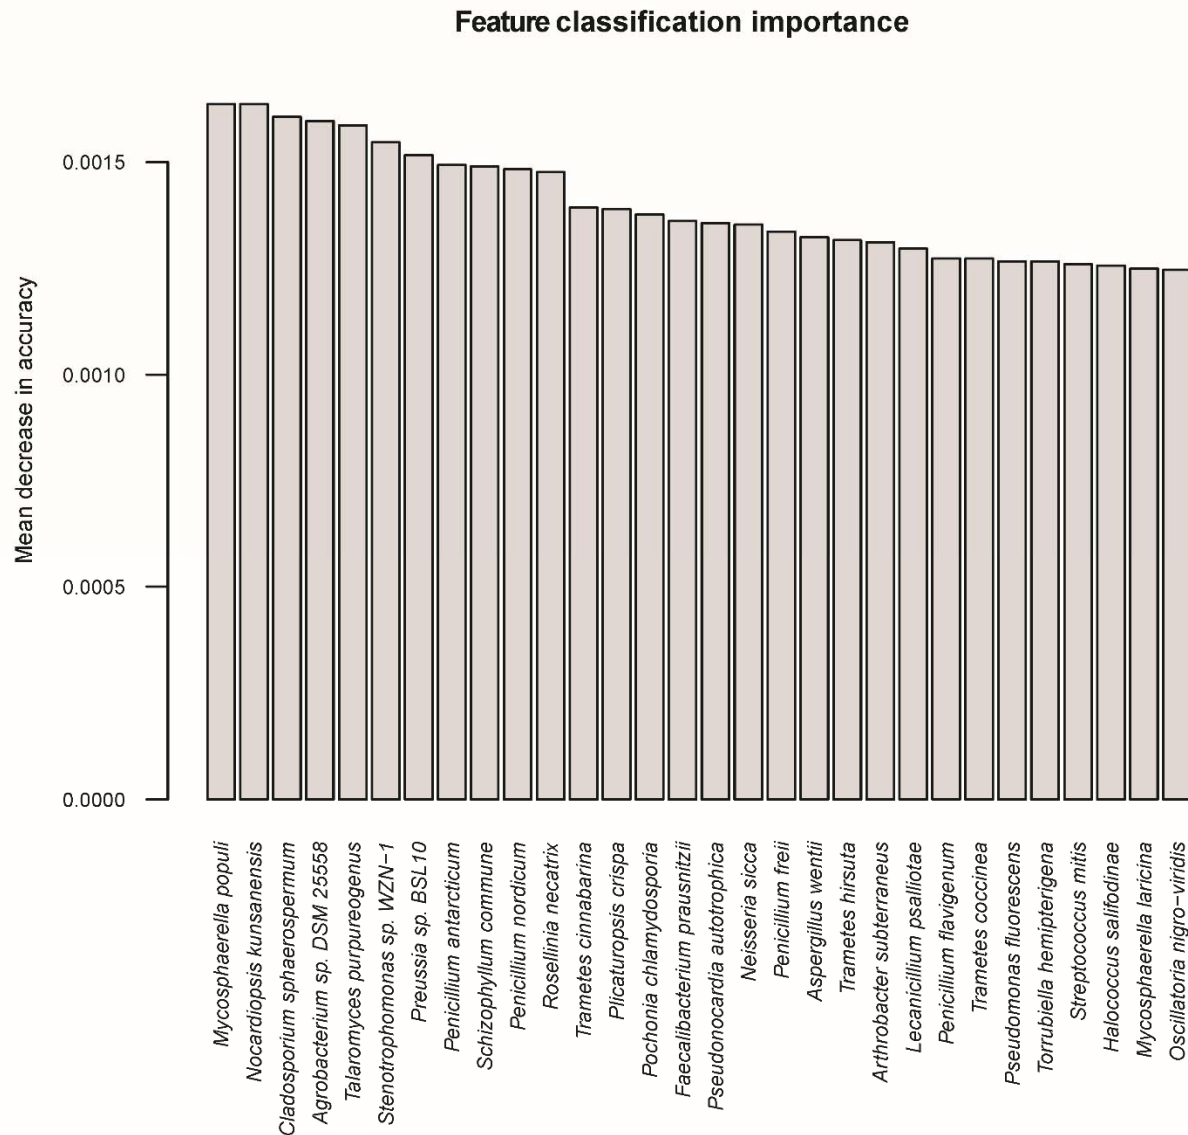

1055 Random forest classification analysis of subway air samples (N=6) where the intermediate pellet  
1056 (N=6) and supernatant (N=6) fractions were processed separately with the MetaSUB method,  
1057 showing taxonomic features with the highest classification variable importance for correctly  
1058 identifying the pellet and supernatant fractions.

1059

1060 **SUPPLEMENTAL ONLINE MATERIAL**

1061  
1062 **Figure S1** – Rarefaction curves with  $\alpha$ -diversity measures: "Observed", "Shannon", and  
1063 "Simpson" for subway air samples (N=6) that were split and processed with the MetaSUB (N=3)  
1064 and Jiang (N=3) or MetaSUB (N=3) and Zymobiomics (N=3) methods.

1065  
1066 **Figure S2** – Rarefaction curves with  $\alpha$ -diversity measures: "Observed", "Shannon", and  
1067 "Simpson" for the intermediate pellet (N=6) and supernatant (N=6) fractions from subway air  
1068 samples (N=6) processed separately with the MetaSUB method.

1069  
1070 **Figure S3** – Proportion of total DNA and 16S rRNA gene copy yield found in the supernatant  
1071 fractions, referencing the total yield in the combined pellet and supernatant fractions, from  
1072 subway air samples (N=24) where the intermediate pellet and supernatant fractions were  
1073 processed separately with the MetaSUB method.

1074  
1075 **Figure S4** – The 20 fungal species that were among the top 100 species from the random forest  
1076 classification analysis of subway air samples (N=3) that were split and processed with the  
1077 MetaSUB (N=3) and Jiang (N=3) methods, where Z-score distributions were compared with  
1078 linear models.

1079

1080

1081

1082

1083
